## Functional Reorganization across Three Episodes in Bipolar Disorder

Xiaobo Liu <sup>1,2+</sup>, Bin Wan <sup>3,4+</sup>, Ruiyang Ge <sup>5</sup>, Ruifang Cui <sup>6</sup>, Zhen-Qi Liu <sup>2</sup>, Jinming Xiao <sup>6</sup>, Xihan Zhang <sup>7</sup>, Lang Liu <sup>8</sup>, Siyu Long <sup>2</sup>, Jiadong Yan <sup>2</sup>, Ke Xie <sup>2</sup>, Meng Yao <sup>6</sup>, Xiaoqiang Liu <sup>9</sup>, Sanwang Wang <sup>10</sup>, Yujun Gao <sup>1\*</sup>

1 Department of Psychiatry, Wuhan Wuchang Hospital, Wuhan University of Science and Technology, Wuhan, China

2 McConnell Brain Imaging Centre, Montreal Neurological Institute, McGill University, Montreal, Canada

3 Max Planck Institute for Human Cognitive and Brain Sciences, Leipzig, Germany

4 Institute of Neuroscience and Medicine (INM-7: Brain and Behavior), Research Center Jülich, Jülich, Germany

5 Department of Psychiatry, University of British Columbia, Vancouver, BC, Canada

6 Sichuan Provincial Center for Mental Health, Sichuan Provincial People's Hospital, School of Life Science and Technology, University of Electronic Science and Technology of China, Chengdu, China

7 Department of Psychology, Yale University, New Haven, CT, USA

8 Department of Human Genetics, McGill University, Montreal, Canada

9 First Hospital of Quanzhou Affiliated to Fujian Medical University, Quanzhou, Fujian, China

10 Department of Psychiatry, Renmin Hospital of Wuhan University, Wuhan, Hubei Province, China

Equal contribution +  
Corresponding author \*

## Abstract

Bipolar disorder (BD) is characterized by a dynamic process encompassing various episode states, including manic episodes (BipM), depressive episodes (BipD), and periods of remission (rBD). Various cognitive and behavioral alterations induced by extreme emotions are implicated across different episodes. However, how exactly brain function is reorganized during these episodes remains largely unstudied. Here, we used low-dimensional representations of brain functions to study the functional organization in individuals with BipM, BipD, rBD, and healthy controls (HC). We found that similar sensory-association reorganization principle across all three episodes, compared to healthy controls. In particular, expansion in sensory regions and compression in association regions were the key principles for reorganization of low-dimensional representation of brain function in BD. Furthermore, such large-scale hierarchical functional reorganization was associated with clinical symptoms at different episodes. Next, this study also implemented regional outward and inward activity propagation to study the information flow in the altered regions. It revealed that all the three episodes had less frequent flows in association regions, clarifying association may be dominant in functional reorganization. By applying a network integration-segregation model, we also observed an increase in functional integration alongside a decrease in functional segregation. Finally, various receptors that were spatially correlated with the episode *t*-maps including serotonin transporter, gamma-aminobutyric acid type A receptor, Alpha-4-Beta-4 nicotinic acetylcholine receptor, and cell profiles including Layer 4 and Layer 5 thick-tufted cells. This study demonstrates that association-dominated binary functional hierarchical anchors could systematically elucidate abnormal neural phenotypes across various BD states.

**Keywords:** Bipolar disorder, Episode states, Functional gradients, functional integration and segregation, signal flow, receptor and cellular maps

## Introduction

Bipolar disorder (BD) is a psychiatric condition characterized by extreme emotional symptoms, presenting along a spectrum of episodes including manic episodes (BipM), depressive episodes (BipD), mixed episodes, and periods of remission (rBD) (Goes, 2023; Grande et al., 2016a; Ljubic et al., 2023; Phillips & Kupfer, 2013). The shared symptoms of different episodes include emotional imbalances, which may lead to various cognitive and behavioral abnormalities and brain functional reorganization (Grande et al., 2016b; Nierenberg et al., 2023). Currently, the treatment modalities for BD involve medication (Fountoulakis et al., 2017), cognitive-behavioral therapy (Costa et al., 2010), and neuromodulation (Thirthalli et al., 2012) aimed at stabilizing patients' emotions and improving cognitive functioning. The efficacy and application of these treatment modalities for BD depend on our understanding of the underlying abnormal functional reorganization and their neural diversity, from molecular components to macroscale changes in brain function. For instance, pharmacological treatments for BD target specific neurotransmitter systems, such as dopamine, serotonin, and norepinephrine, to regulate mood and cognitive functions by modulating signal transmission between brain regions (Cousins et al., 2009). While ECT directly acts on brain networks by inducing brief seizures to reset functional connectivity patterns (Sun et al., 2022), enhancing global brain integration and rebalancing functional networks (Thirthalli et al., 2012). However, there is currently a lack of effective biomarkers to systematically understand and quantify the potential mechanisms and therapeutic efficacy across various episodes.

Our current measurement of the brain function alterations in BD primarily relies on functional magnetic resonance imaging (fMRI) (Liu et al., 2024; Nan et al., 2024; Waller et al., 2021), the dynamic changes in brain function across various episodes. Resting-state functional connectivity studies have indicated that the emotional dysregulation and cognitive impairments in BD individuals result from disrupted connectivity between brain regions (Thermenos et al., 2010). Utilizing graph theory, studies have found that BD is associated with alterations in brain modularity (L. Zhang et al., 2021). These findings have partially elucidated the underlying mechanisms of BD, implicating neural representations across multiple brain regions and explaining the extensive cognitive dysfunctions triggered by emotional dysregulation, including deficits in high order cognition, e.g., emotional regulation (Townsend & Altshuler, 2012), cognitive control (Breukelaar et al., 2020), memory (Bearden

et al., 2006), and attention (Phillips & Swartz, 2014) and sensory processing ability (Lyo et al., 2006). The complex emotional dysregulation and resulting behavioral abnormalities observed in rBD, BipM and BipD, could be recharacterized by functional reorganization on human cortex (Northoff & Hirjak, 2024; Rihmer & Kiss, 2002; Russo et al., 2020).

Recent advancements in conceptual and methodological approaches have shed light on the intrinsic functional organization of the brain. One study, in particular, examined cortical regions by embedding them within a low-dimensional manifold space, known as the functional gradient (Margulies et al., 2016). This functional gradient captures the integration and segregation of functional connectivity profiles across distinct cortical regions, offering a comprehensive framework for understanding spatial connectivity trends and the functional-spatial order of continuous brain regions across the cortical mantle (Margulies et al., 2016). Previous research has correlated cortical functional organization with cortical morphology, superficial white matter microstructure, structure-function coupling (Vázquez-Rodríguez et al., 2019), and genetic patterns (Xia et al., 2022), highlighting variations along the functional axis associated with microstructural and even cellular changes (X.-H. Zhang et al., 2023). Extending the functional gradient approaches, a recent study has developed the Nested Spectral Partitioning (NSP) method to determine the global balance between segregation and integration on the whole human networks. This balance supports different cognitive abilities (R. Wang et al., 2022) and may be related to cognitive dysfunction and disease expression (Sporns, 2013). Moreover, recent methodological advancements in information flow have further elucidated the directional interaction between sensory and association brain regions, greatly enhancing the technical framework of brain hierarchy (Frässle et al., 2021). In all, such overarching functional segregation-integration hierarchy could offer a unified and simplified representation of functional neural architecture, aiding in characterizing the stratification of various types of functional abnormalities across BD episodes and informing subsequent treatment strategies.

In the present work, we proposed that functional reorganization patterns revealed neural diversity and systematically evaluated the functional stratification of various BD episodes. This included assessing abnormal function stratification, evaluating the stability and heritability of these stratified regions, investigating their spatial causality, further clarifying functional imbalance progression across episodes, associating with clinical relevance and examining molecular bases. Firstly, we characterized the functional hierarchy using

non-linear connectome compression technique. Next, we delved into the stability and heritability of these reorganization regions by leveraging an independent retest cohort and a twin pedigree set-up derived from the Human Connectome Project (Elam et al., 2021). Subsequently, we employed regression dynamic causal modeling (rDCM) to estimate the effective connectome to shed light on how information flows across among reorganization regions. Via the NSP model, we further estimated progression of functional imbalance across various episodes as holistic principles. Of paramount importance, we assessed whether the functional variations are correlated with the clinical symptoms of BD episodes, thereby emphasizing the clinical implications of our neuroimaging findings. Lastly, we investigated the molecular mechanisms underlying functional reorganization in bipolar episodes by linking them to receptor maps and cellular maps. We anticipate that our research may offer insights into the holistic functional reorganization principle and implying potential medical treatment strategies for BD.

## Results

### *Functional reorganization along episode states*

We applied diffusion map embedding (Vos de Wael et al., 2020) to cortex-wide functional connectomes derived from resting-state fMRI for each individual and investigated the alteration of functional organization gradients for each episode state compared to healthy controls. The average principal functional gradient maps across rBD, BipD, BipM and HC demonstrated a continuous spatial transition from sensory regions to association regions in all groups (**Figure 1a**), accounting for  $15.00\% \pm 0.70\%$ ,  $15.14\% \pm 0.92\%$ ,  $15.30\% \pm 0.78\%$  and  $15.14\% \pm 0.83\%$  of total variance respectively and aligning with previous study (Margulies et al., 2016). **Figure 1b** and **Figure 1c** showed variability of functional gradient across various episodes. Notably, we found rBD, BipD and BipM exhibited markedly higher gradient values in sensory regions and significantly lower gradient values in association regions (all  $p_{FDR} < 0.05$ ). Specifically, the common reorganization regions across the 3 episodes included visual network, dorsal attention network posterior, orbitofrontal cortex in limbic, lateral prefrontal and medial prefrontal in control network, cingulate cortex in control network according to Yeo atlas (Yeo et al., 2011). More specifically, those networks included temporal regions, parietal regions, prefrontal regions, precuneus/posterior cingulate cortex, dorsal prefrontal cortex/medial prefrontal cortex and visual regions (**Figure 1d**). Note that we didn't observe any statistically significant relationship among the three episodes after correction

**(Supplementary S-Figure 4).** The specific functional reorganization regions for various episodes were displayed in **Supplementary S-Figure 3** and **S-Figure 4**. Those results showed functional reorganizations were similar across all episodes and implied it as a common principle to reveal potential shared mechanisms for BD episodes. To further clarify annotation of functional reorganization, we linked those cortical maps to NeuroSynth (Yarkoni et al., 2011). We chose 20 terms from (Margulies et al., 2016) and found that functional reorganization patterns across three episodes were especially related to high order cognition (e.g., emotion inhibition and social cognition, shown in **Figure 1e**), confirming those patterns that were similar across three episodes. Finally, given the functional gradient maps are asymmetric (Wan et al., 2022), we found a significant difference between various episodes and HC in the insular cortex (**Supplementary S-Figure 5**), which is also demonstrated by previous literature (Wan et al., 2022). In all, we observed that expansion in sensory regions and compression in association were general functional reorganization principles of various episodes, in contrast to HC. However, the three episodes did not differ from each other.

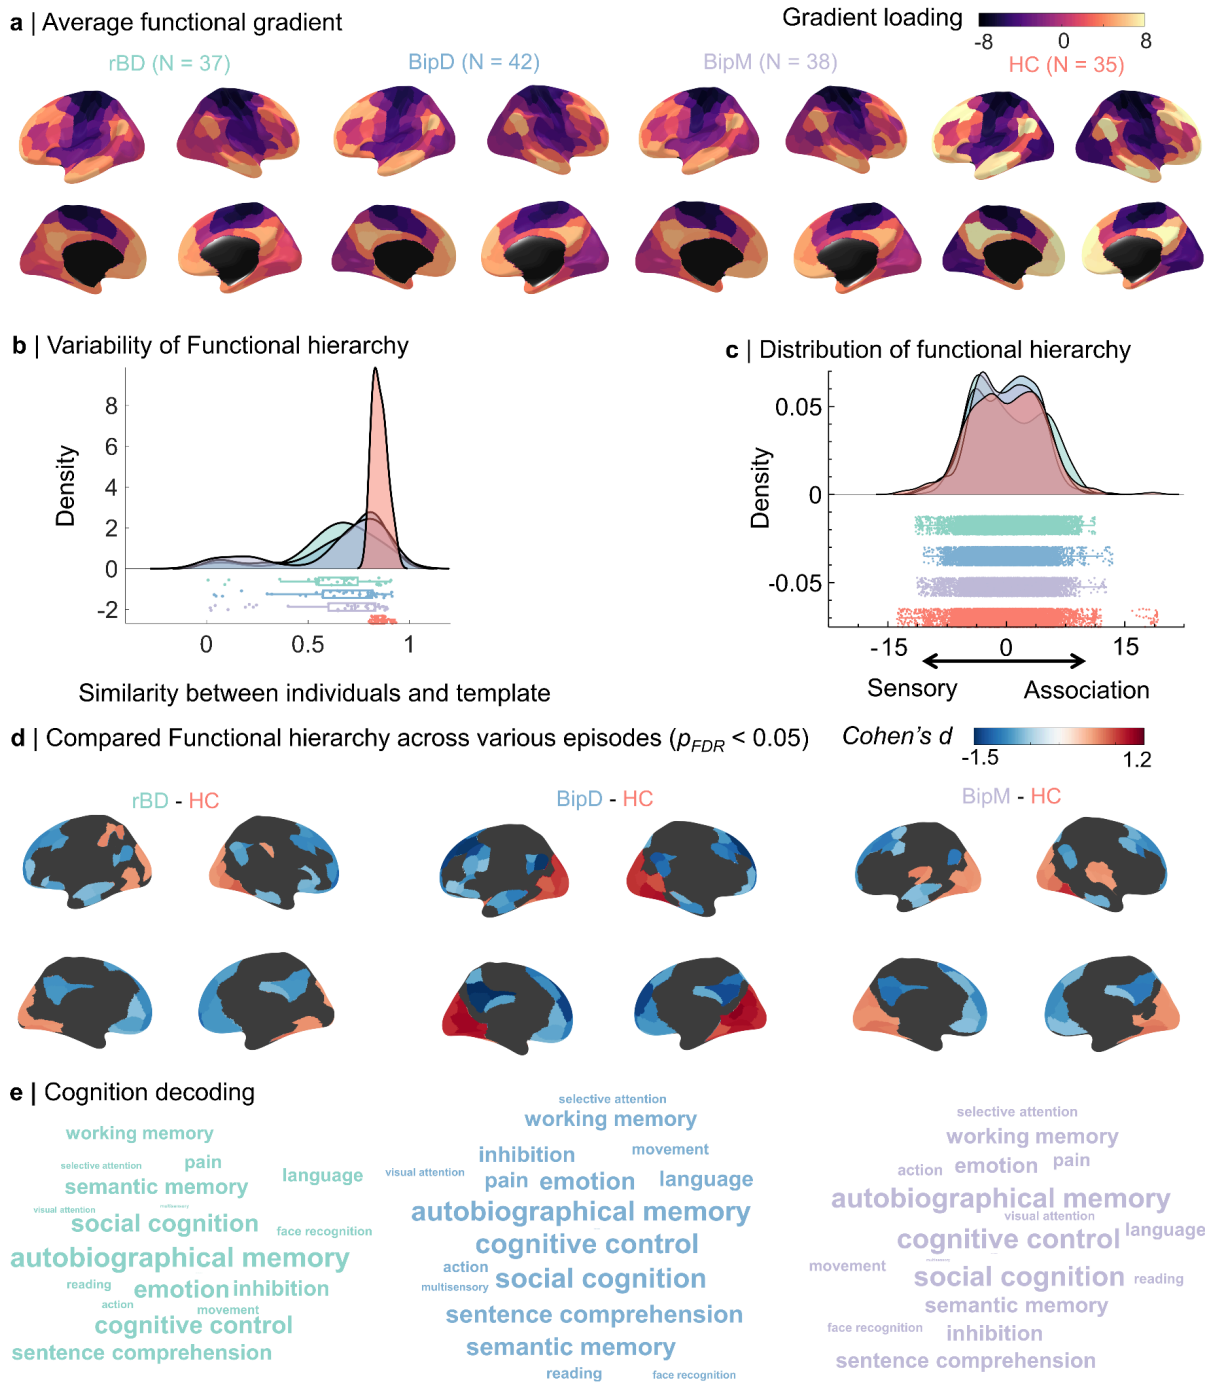

**Figure 1.** Similar functional reorganization in various episodes. **a.** The average principle gradient maps of rBD, BipD, BipM and HC groups. **b.** Variability of functional gradient across different subjects. **c.** distribution of functional gradients from various episodes. **d.** Comparison between various episodes and healthy controls ( $p_{FDR} < 0.05$ ). **e.** Cognition decoding via Neurosynth map. Note that term size represents the correlation between functional reorganization maps and NeuroSynth maps.

### *Information flow in reorganization regions*

After identifying functional reorganization regions in various episodes, we further explored how information flows clarified dominance between sensory and association systems. We implemented rDCM to estimate the cortex-wide effective connectome for each participant. Here, we calculated outward and inward degree centrality in both sensory and association regions to represent information flow across regions (**Figure 2a**). To simplify the analysis, we averaged outward and inward degrees in sensory and association regions respectively. Via one-way analysis of variance (ANOVA), we found there was a significant difference in outward ( $F_{(3,149)} = 4.24, p = 0.007$ ) and inward ( $F_{(3,149)} = 3.27, p = 0.023$ ) degrees in association regions between rBD/BipD/BipM and HC (**Figure 2b**). The *post hoc* analyses revealed that average outward degree in association regions for rBD ( $t = -2.18, p = 0.033$ ), BipD ( $t = -2.00, p = 0.049$ ) and BipM ( $t = -3.45, p < 0.001$ ), compared to HC. Similarly, lower average inward degree in association regions for rBD ( $t = -2.03, p = 0.046$ ), BipD ( $t = -1.90, p = 0.061$ ), and BipM ( $t = -3.05, p = 0.003$ ), compared to HC. But we didn't find any statistical difference in both average outward and inward degree in sensory regions between episodes and healthy controls ( $p > 0.05$ ), indicating the information flow differences were specific to association regions. Those results further clarified association regions dominated the functional reorganization along cortical continuous axes.



**a** | Description for information transition in two functional reorganization anchors

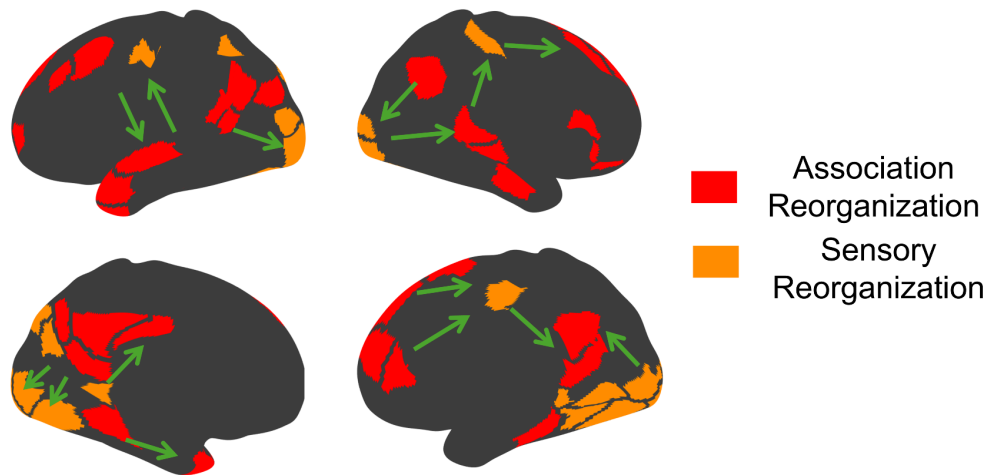

**b** | Compared average outward degree and inward degree in association regions

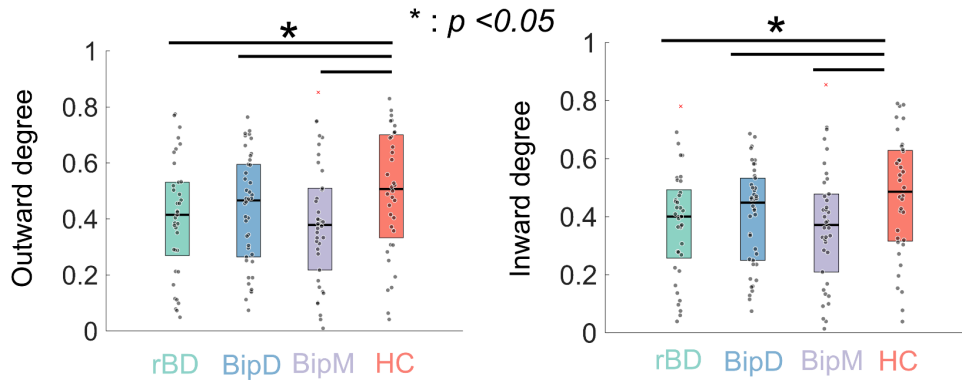

**Figure 2.** **a.** Outward and inward of association reorganization regions across rBD, BipM and BipD. Note that the arrows represent information exchange among sensory regions and association regions via inward and outward degree. **b.** We found there was a significant difference ( $p < 0.05$ ) in outward and inward association regions among rBD, BipD and BipM. Note that \* means significant after *post hoc* analysis.

*Differentiated integration and separation among various episodes*

Although gradient loadings offer a perspective to detect both integration and segregation along an axis, local integration and segregation here helps clarify whether our results are still robust. Therefore, we explored the separate functional integration and segregation across various episodes via NSP (**Figure 4a**). We observed that the first component of NSP was significantly positive related to the functional gradient map ( $r = 0.51$ ,  $p < 0.001$ ) in supplementary **S-Figure 8**, suggesting NSP revealed similar information as functional gradient. To further explore association between NSP values and functional reorganization, integration scores defined by NSP were positively correlated with sensory reorganization ( $r = -0.34$ ,  $p < 0.001$ ) and segregation scores were negatively correlated with association

reorganization regions ( $r = 0.21, p = 0.022$ ) in **Supplementary S-Figure 9**. This suggests that the reorganization of sensory regions is more related to functional integration, while the reorganization of association regions is more associated with functional segregation. Functional separation significantly increased ( $F_{(3,149)} = 16.81, p < 0.001$ ) while functional integration significantly decreased from rBD, BipD and BipM ( $F_{(3,149)} = 14.32, p < 0.001$ ) (**Figure 4b**). *Post-hoc* analyses showed rBD had significantly lower functional separation than BipD, BipM and HC while BipD had significantly lower functional separation than BipM and HC ( $p$  values  $< 0.05$ ). In contrast, rBD had significantly higher functional integration than BipD, BipM and HC, BipD had significantly better functional integration than BipM and HC and BipM also had better functional integration than HC ( $p < 0.05$ ). These results further emphasize that the dynamic changes in integration and segregation during functional reorganization in BD may reflect a progression of functional imbalance from rBD to BipD, BipM, and finally to HC. In summary, these findings highlight integration and segregation as holistic principles for understanding functional reorganization in BD. They suggest that from rBD to BipD and BipM, the capacity for functional integration progressively weakens, indicating a gradual decline in integrative capacity along this trajectory.

### a | Functional integration and segregation across whole cortex

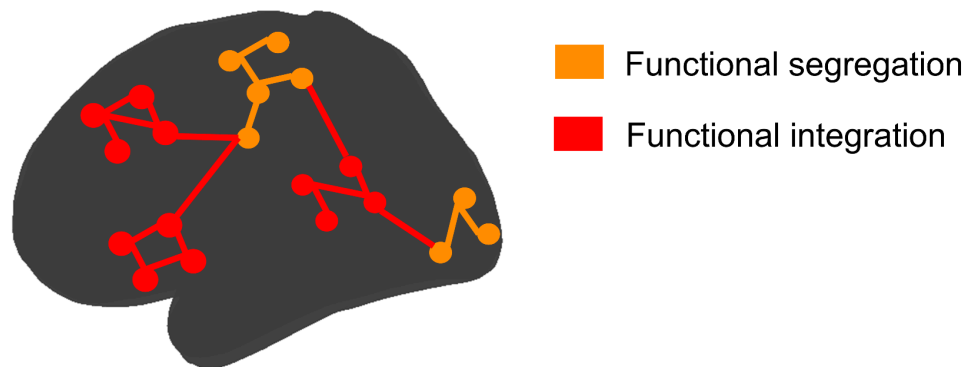

### b | Abnormal functional integration and segregation across various episodes

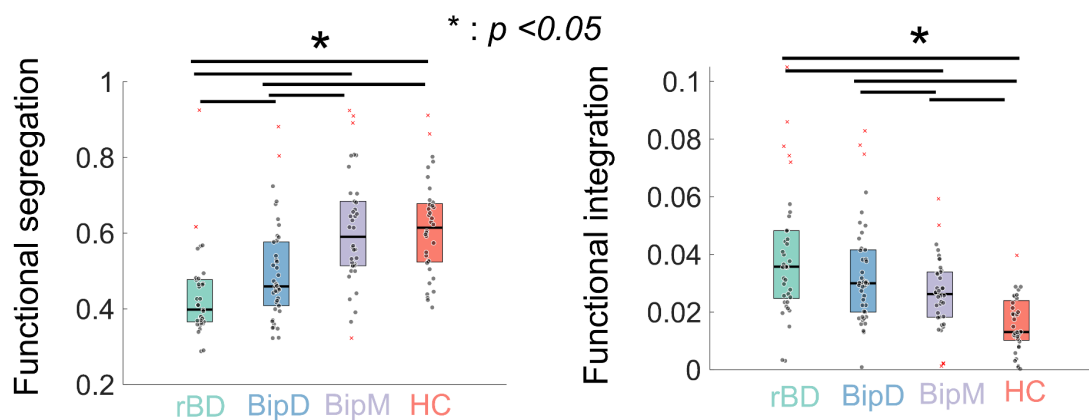

**Figure 3.** Functional separation and functional integration among rBD, BipD and BipM. a. Whole cortex functional integration and functional segregation. b. Whole cortex functional integration and functional segregation across various episodes (\* means  $p < 0.05$  after *post-hoc* analysis).

#### *Functional reorganization and clinical symptom in various episodes stages*

Next, we probed the behavioral association with neuroimaging findings (**Figure 5**). We observed a significantly negative correlation between the PDQ score and the functional reorganization of sensory areas in rBD ( $r = -0.48$ ,  $p = 0.003$ ). More specifically, insufficient functional reorganization in sensory areas may exacerbate difficulties or impairments in perception for these patients. The analysis also revealed positive correlation between the HDRS score and the reorganization of the association areas in BipD ( $r = 0.32$ ,  $p = 0.038$ ), and between the YMRS score and reorganization of the association areas ( $r = 0.43$ ,  $p = 0.006$ ) in BipM. These findings confirmed clinical relevance of the functional reorganization

for various BD episodes and further revealed that functional reorganizations may be caused by emotion alternation.

Clinical association with two functional reorganization modes

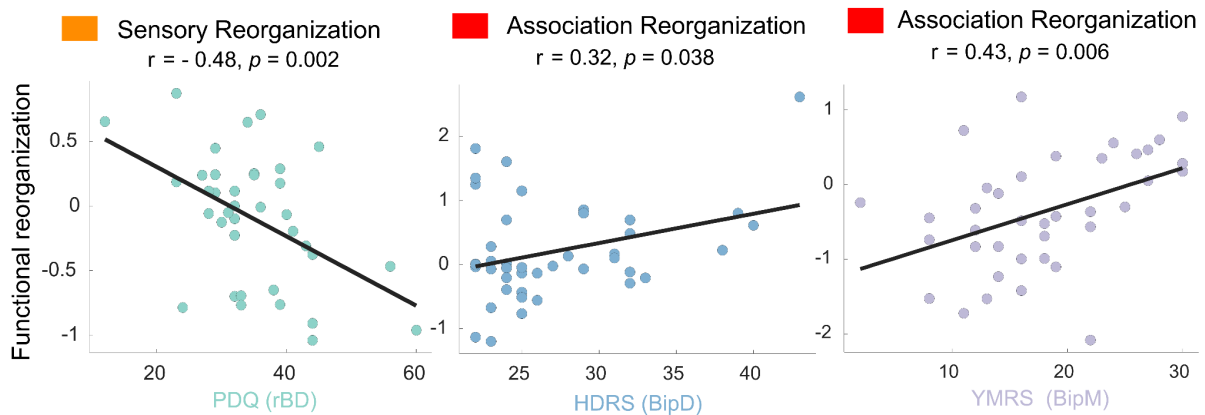

**Figure 4.** Functional reorganization in association as well as sensory regions and clinical symptoms across various BD episodes. sensory reorganization in rBD was negatively related with PDQ scores ( $r = -0.48, p = 0.0029$ ). Association reorganization was positively related with HDRS in BipD ( $r = 0.32, p = 0.038$ ) and positively related with YMRS in BipM ( $r = 0.43, p = 0.006$ ). HDRS, Hamilton Depression Rating Scale; YMRS, Young Mania Rating Scale; PDQ, Perceived Disability Questionnaire .

#### *Molecular underpinnings functional reorganization*

Next, we further tested biological association of functional reorganization patterns and focused on common regions across 3 episodes. Specifically, we extracted the reliable features from test-retest twin-designed Human Connectome Project (HCP) and test heritability. Higher reliability and heritability were used to ensure the reorganization for each episode emerging biologically but not due to the data noise (Wan et al., 2022). It showed that 100% of gradient values of sensory-association regions and their average heritability was  $0.52 \pm 0.13$  in rBD, BipD and BipM (**Supplementary S-Figure 6a**). This suggests that the reorganization in BD was very likely biologically so we performed the following molecular and cellular analyses to understand the potential mechanisms (Wan et al., 2022b, 2023).

We conducted spatial correlation analyses between the molecular or cellular maps and functional reorganization maps for each episode. The molecular and cellular maps are from Neuromaps (Markello et al., 2022; X.-H. Zhang et al., 2023), which provides normative maps for various neurotransmitter systems and cellular systems. Here the spatial correlation reflects which receptor and cellular types association aligned spatially with the sensory-association reorganization axis across various episodes. Specifically, negative association values showed

higher cell or neurotransmitter density more related to sensory reorganization while positive correlation showed more related to association reorganization. Notably, **Figure 6a** showed that reorganization of sensory areas was correlated with Paired box gene-cell (Pax6), Synuclein (Sncg), Astrocyte (Astro) and Layer 5 thick-tufted (L5IT). Reorganization of association areas was correlated with L4IT (Layer 4 thick-tufted). These associations suggest that specific genes and cell types may have distinct contributions and mechanisms in the process of functional reorganization and adaptation in different brain regions. This indicates that functional changes in different brain areas may depend on specific molecular and cellular characteristics. At the cellular level, we also found that reorganization of association areas was correlated with the Serotonin Transporter (5-HTT), Dopamine Transporter (DAT), Gamma-Aminobutyric Acid Type A Receptor (GABA<sub>A</sub>), whereas reorganization of sensory areas was correlated with the Alpha4Beta4 Nicotinic Acetylcholine Receptor Subtype ( $\alpha 4\beta 4$ ), Cannabinoid Receptor Type 1 (CB1) and Vesicular Acetylcholine Transporter (VACHT) (shown in **Figure 6b**). These findings suggest that the functional reorganization of different brain regions may rely on distinct neurotransmitter and receptor signaling mechanisms, which in turn influence their functional performance under specific pathological or adaptive conditions. Together, these findings suggest that the functional reorganization pattern across various BD episodes aligned topographically with the cortical distribution of chemical neuromodulator systems and implied their potential molecular biomarker.

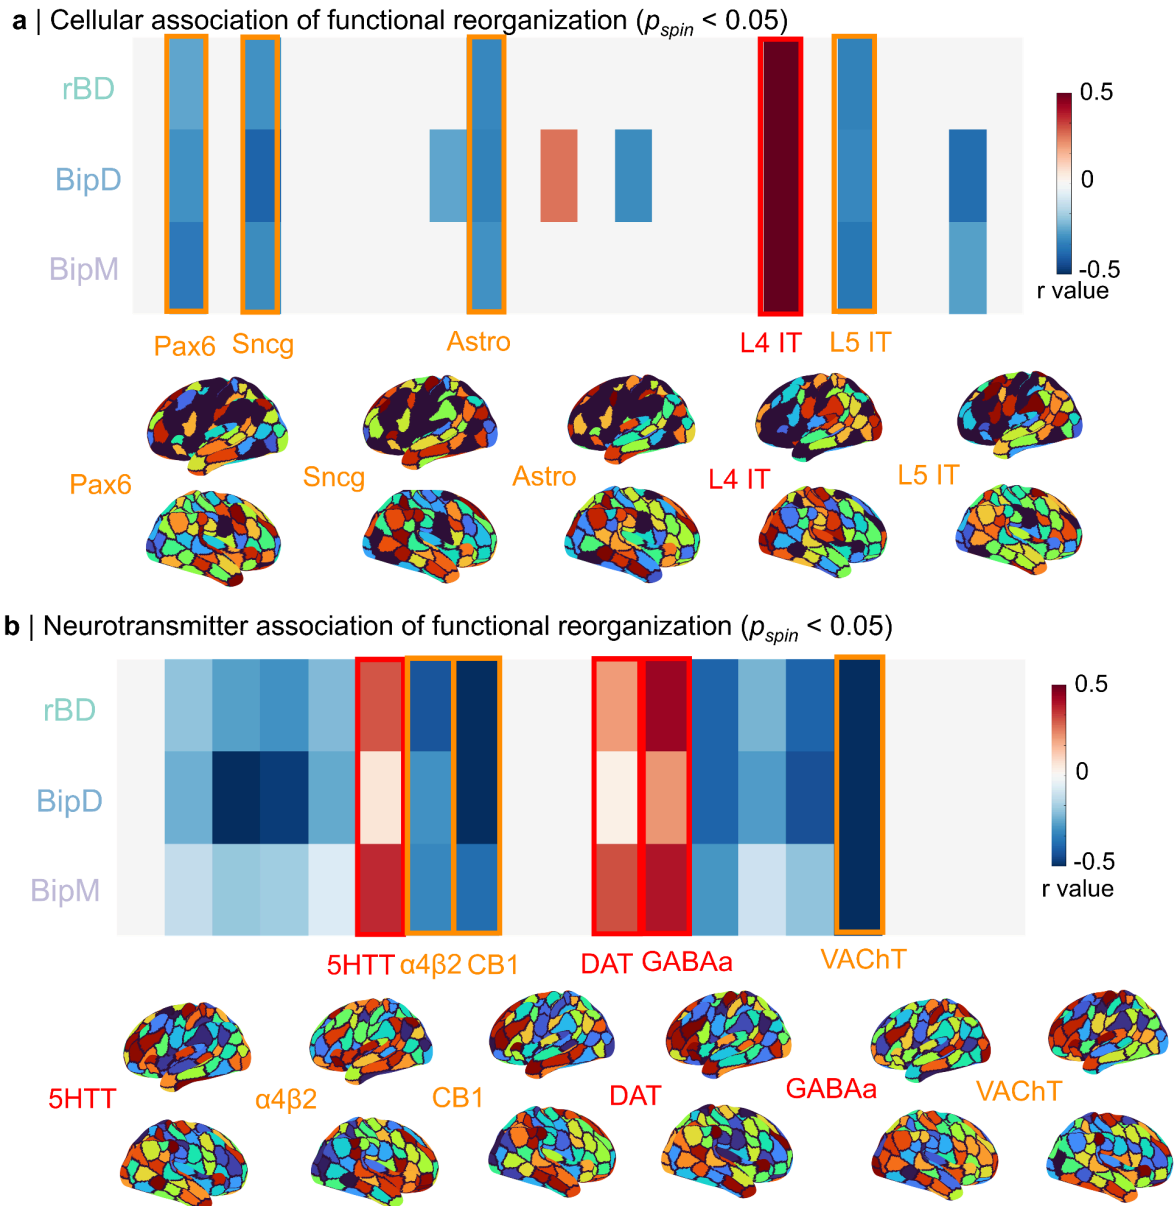

**Figure 5.** Molecular mechanism of two functional reorganization anchors. **a.** cellular mechanism of two functional reorganization anchors (red lines presented functional reorganization mode in association regions, yellow lines presented functional reorganization mode in sensory regions). We found sensory reorganization correlated with Pax6, Sncg, Astro, L4IT and L5IT and association reorganization correlated with L4IT ( $p_{spin} < 0.05$ ). **b.** We found association reorganization correlated with 5HTT, DAT, GABAa and sensory reorganization correlated with  $\alpha 4\beta 4$ , CB1, and VAcHT ( $p_{spin} < 0.05$ ). Note that Pax6, Sncg, Astro, L4IT, L5IT, 5HTT, DAT, GABAa,  $\alpha 4\beta 4$ , CB1, VAcHT means Paired box gene, Synuclein, Astrocyte, Layer 4 thick-tufted, Layer 5 thick-tufted, Serotonin Transporter, Dopamine Transporter, Gamma-Aminobutyric Acid Type A Receptor, Alpha4Beta4 Nicotinic Acetylcholine Receptor Subtype, Cannabinoid Receptor Type 1 and Vesicular Acetylcholine Transporter.

## Discussion

In the present study, we employed nonlinear manifold learning on intrinsic functional connectivity and uncovered reorganization in two distinct regions along the sensory-association axis in BD, compared to healthy controls. Specifically, sensory regions showed expansion while association regions exhibited compression. The informatic significance of such the reorganization could be explained by analyses in the outward and inward propagation of activity and local integration-segregation. Furthermore, this large-scale hierarchical reorganizations in different BD episodes were also linked to the clinical symptoms, suggesting functional reorganization may be caused by emotional abnormalities. Finally, we examined the association between reorganization maps and various cell type/receptor maps, observing that their potential molecular mechanism including serotonin transporter, gamma-aminobutyric acid type A receptor, Alpha-4-Beta-4 nicotinic acetylcholine receptor, and cell profiles including Layer 4 and Layer 5 thick-tufted cells.

The expansion of sensory regions and compression of association regions suggests a significant reconfiguration of brain network architecture in BD. Previous studies have also found compression functional gradients in the association regions of BD (Lin et al., 2023) and expansion gradients in sensory regions (Lei et al., 2023). It may suggest association is somehow a common marker for the network reorganization in psychiatry (van den Heuvel & Sporns, 2019), such as autism spectrum (Hong et al., 2019), depression disorder (Pasquini et al., 2023) and schizophrenia (Dong et al., 2020). Our findings also suggest that such reorganization is a common marker for episodes in BD, though there is no statistical difference between episodes. The functional gradient reflects both global integration and segregation (Margulies et al., 2016). In this study, functional reorganization in three BD episodes indicated that sensory and motor areas, which are primarily responsible for processing external stimuli, become more prominent, while association regions involved in higher-order cognitive functions lose their functional influence (Buckner et al., 2009). Such reorganization could be a compensatory mechanism where the brain reallocates resources to maintain basic sensory and motor functions at the expense of higher-order cognitive processes. This finding is consistent with previous studies that have reported reduced connectivity within the DMN (R. Wang et al., 2022) and affective networks during acute episodes but not in remitted states of BD.



In all, the expansion of sensory regions and the compression of association regions, as shared neural representations across different BD episodes, may reflect the broad impact of emotional changes on various cognitive functions within BD. The heightened functionality observed in sensory and motor areas might be a response to acute emotional fluctuations, aimed at maintaining basic perceptual and motor abilities (Basco & Rush, 2005). Conversely, the decline in functionality within association integration areas may indicate compromised emotion regulation and higher-order cognitive processing abilities (Schmitt & Schoen, 2022). The pressure induced by emotional changes may lead the brain to rely more heavily on fundamental sensory and motor functions to sustain individual survival and basic interaction abilities in the short term (Hupfeld et al., 2021). This functional reorganization may reflect that, although BD patients adopt different strategies to cope with emotional and cognitive stress at various stages, there may be an inherent instability and plasticity within their neural networks. During manic and depressive episodes, where individuals experience extreme emotional and behavioral states, resources from higher-order cognitive functional areas may be reallocated to more fundamental sensory and motor areas to cope with the physiological and behavioral changes induced by extreme emotions (Koban et al., 2021). In the remissive phase, this reorganization may partially recover, but a certain degree of functional segregation is retained as the brain prepares to address potential future emotional fluctuations. The expansion of sensory regions and the compression of association regions may reflect the inherent instability and plasticity of the neural networks (Paquola et al., 2020) in BD. The brain networks of BD patients may be more susceptible to the effects of emotional changes, leading to more pronounced functional reorganization. Although this plasticity may help cope with emotional fluctuations in the short term, in the long run, it may result in sustained impairments in higher-order cognitive functions and diminished emotional regulatory abilities.

Our study also highlights the significant role of aberrant association information interaction in BD, compared with sensory regions. We found that the signal outward flow and inward flow of association regions were significantly lower in all three episodes of BD compared to healthy individuals. A widely accepted mechanism underlying bipolar disorder is the early developmental disruption in brain networks that regulate emotional behavior (e.g., white matter connectivity and prefrontal pruning), leading to reduced connectivity between the ventral prefrontal network and limbic brain regions (Strakowski et al., 2012). Those regions consist of association regions and their reduced connectivity suggest a core dysfunction in



BD that transcends symptomatic episodes, contributing to the cognitive and emotional dysregulation observed in BD (Wu et al., 2023). Our findings in this study aligned with the findings and further clarified association regions were dominated in the functional reorganization across various episodes of BD .

Using large-scale functional connectivity modeling, we observed a significant increase in the brain's integration capacity and a decrease in its segregation capacity during manic, depressive, and remissive phases of BD compared to healthy controls. These alterations suggest a shift towards a more globally connected but less modular brain network organization in BD. A normally functioning brain at rest maintains a balance between segregation and integration, allowing for efficient communication both locally and globally. This balance is associated with the integration of primary sensory information and emotion regulation (Qin et al., 2012). Previous studies have indicated that imbalances in this functional segregation and integration may be related to functional abnormalities in various brain disorders (Chang et al., 2023). In this study, we further emphasize that the hierarchical structure of integration-segregation may underlie the emotional abnormalities and consequent behavioral anomalies observed across different BD episodes. Increased integration capacity may reflect compensatory mechanisms attempting to maintain cognitive function, while decreased segregation capacity could indicate a loss of specialized processing within distinct functional domains. This shift in network organization is consistent with findings from studies comparing functional connectivity patterns between unipolar and bipolar depression, which have shown altered connectivity in prefrontal and limbic networks (Alamian et al., 2017).

Finally, our research revealed those two functional reorganization anchors among three episodes of BD were highly stable and heritable. Notably, we found sensory reorganization correlated with Pax6, Sncg, Astro, and L5IT, and association reorganization correlated with L4IT. On the cellular level, we also found association reorganization correlated with 5HTT, DAT, GABA<sub>A</sub>, and sensory reorganization correlated with  $\alpha 4\beta 4$ , CB1, and VACHT. Indeed, functional characteristics of the human brain are, to a certain extent, rooted in the diverse types of cells that constitute the cerebral cortex, and the spectrum of cortical cells follows the macroscopic organization of functional gradients and associated large-scale networks (X.-H. Zhang et al., 2023). 5HT<sub>4</sub> receptors are involved in modulating serotonin signaling, which plays a crucial role in mood regulation and cognitive function (Bockaert et al., 2008).

Similarly, 5HTT receptors are serotonin transporters, responsible for the reuptake of serotonin, thereby influencing its availability in the synaptic cleft (Homberg & van den Hove, 2012). CB1 receptors, on the other hand, are part of the endocannabinoid system, which regulates various physiological processes, including mood regulation and synaptic plasticity (Viveros et al., 2007). GABA receptors are inhibitory neurotransmitter receptors that modulate neuronal excitability and are crucial for maintaining the balance between excitation and inhibition in the brain (Sears & Hewett, 2021). mGluR5 receptors are metabotropic glutamate receptors that play a role in synaptic plasticity and excitatory neurotransmission (Ben-Ari et al., 2012). Our findings further indicate that these receptors collectively modulate synaptic plasticity and firing patterns, thereby altering large-scale functional integration and segregation. These abnormalities could represent the molecular pathology underlying emotion-driven brain function and behavioral anomalies across different BD episodes. Similarly, Pax6 (Kikkawa et al., 2019), Snc (Mederos & Perea, 2019) and L5IT single-cell (Romand et al., 2011) spectra are indicative of specific cell types and their gene expression profiles, which are intricately linked to the observed changes in brain network organization. The modulation of these receptors and cells may influence the underlying mechanisms of bipolar disorder, shedding light on its pathophysiology and providing potential targets for therapeutic intervention.

## **Limitation**

Several limitations warrant consideration in this study. Firstly, our sample was sourced from a single center, and the relatively small sample size may constrain the reliability and generalizability of our findings. Future research will focus on multicenter studies with larger samples to address these limitations. Such an approach will enhance the external validity of our research, facilitating the extrapolation of findings to a broader patient population. Secondly, our study included both initial BipM patients and those with rBD beyond the medication washout period to gain a comprehensive understanding of the imaging features of BD. It is important to acknowledge the potential impact of medications on brain structure and function as a limitation though this is a common challenge in BD research, and an ideal solution has yet to be identified. Lastly, the receptor maps and cellular maps utilized in our study were derived from group-averaged results of previous research, without accounting for individual differences. Future studies will need to validate these findings by considering individual variability.

## **Conclusion**

In summary, our study systematically elucidates brain functional reorganizations during different BAD episodes, providing novel insights into the disorder's mechanisms and potential therapeutic targets. The identified patterns of sensory expansion and association compression suggest a reconfiguration of brain network architecture that aligns with compensatory mechanisms and core dysfunctions in BD. The associations with specific receptors and cell spectra further highlight the molecular basis of these changes, offering potential targets for therapeutic intervention. These findings underscore the importance of integrating genetic, molecular, and functional imaging data to develop more effective and personalized treatment strategies for BD, ultimately improving patient outcomes and quality of life.

## ***Method***

This study was conducted following ethical approval from the Ethics Committee of Renmin Hospital of Wuhan University (Ethics Approval Number: WDRY22022-K195). Prior to study initiation, comprehensive explanations of the objectives, procedures, and precautions were provided to participants and their families, particularly for those patients who lacked decision-making capacity. Informed consent was obtained only after confirming that all participants and their families were fully informed and had a clear understanding of the study details. Subsequently, written informed consent forms were signed. The study was registered with the National Medical Research Registration Information System and the Chinese Clinical Trial Registry (Registration Number: ChiCTR2200064938).

### *Clinical symptoms and cognitive assessment*

The Young Mania Rating Scale (YMRS) , is a clinical assessment tool designed to evaluate the severity of manic symptoms. It comprises 11 items, with scores ranging from 0 to 4 for items 1, 2, 3, 4, 7, 10, and 11, and from 0 to 8 for items 5, 6, 8, and 9 (Young et al., 1978). The severity of manic symptoms is determined by the total score: Normal (0-5), Mild (6-12), Moderate (13-19), Severe (20-29), and Very Severe (30 and above). Clinicians assess each item based on patient responses, and the total score guides the understanding and management of manic symptoms. The Hamilton Anxiety Scale (HAMA) objectively assessed anxiety symptoms . It includes 14 items, each scored from 0 to 4, representing levels of symptom severity: None (0), Mild (1), Moderate (2), Severe (3), and Very Severe (4). Anxiety factors are categorized into somatic and psychic, and scores are analyzed accordingly. According to Chinese criteria, scores are categorized as follows: a total score  $\geq 29$  indicates severe anxiety;  $\geq 21$  indicates definite anxiety;  $\geq 14$  indicates the presence of anxiety;  $\geq 7$  suggests possible anxiety; and  $\leq 7$  indicates the absence of anxiety symptoms. The Hamilton Depression Rating Scale (HDRS) is widely used to assess the severity of depression (Hamilton, 1960). The HDRS-17 is a newer version that categorizes disease severity with lower scores indicating milder conditions and higher scores indicating more severe cases. HAMD is divided into seven factors: Anxiety/Somatization, Weight, Cognitive Disturbances, Diurnal Variation, Retardation, Sleep Disturbances, and Desperation. According to Chinese criteria, scores are categorized as follows: a total score  $< 7$  indicates normal; 7-17 suggests possible depressive symptoms; 17-24 indicates definite depressive symptoms; and  $>24$  indicates severe depressive symptoms.

The Perceived Disability Questionnaire (PDQ) assesses the degree of impairment in daily life, work, social, and leisure activities. It consists of 20 items, each scored on a 5-point scale from 0 (no difficulty) to 4 (extremely difficult). The questionnaire covers various functional activities such as concentration, work completion, social interaction, and household chores.

### *Imaging Dataset*

We Collected data from patients diagnosed with Bipolar Disorder who sought treatment at the Department of Psychiatry and Psychology, Wuhan University People's Hospital, from September 2021 to December 2023. Initial screening of research participants was conducted using the Chinese version of the Mini-International Neuropsychiatric Interview (MINI) (Amorim, 2000). All participants were diagnosed by two experienced psychiatrists following the Diagnostic and Statistical Manual of Mental Disorders Fifth Edition (DSM-5) criteria for BD (Association & others, 2000). Inclusion and exclusion criteria for the BipM group: Age 18-45; DSM-5 diagnosis of BD, YMRS > 7, and HAMD < 7; First episode and untreated or first-time undergoing treatment.criteria for BipD group was HRSD-17 > 7 and YMRS < 7.Inclusion criteria for rBD group: Age 18-45; DSM-5 diagnosis of BD, HAMD < 7, and YMRS < 12; Patient-initiated discontinuation for more than 14 days. Exclusion criteria: MRI contraindications; Organic brain diseases; Other mental illnesses; History of medication or physical therapy for BipM patients; Left-handedness; Unstable physical illnesses; Substance abuse history; Pregnancy or lactation; Concurrent other brain function disorders. HCs were recruited through community, university, and Hubei Provincial People's Hospital posters, with age and gender to the patient group; right-handedness. Exclusion criteria for HCs: MRI contraindications; Organic brain diseases; Substance abuse history; Pregnancy or lactation; Family history of neurological or psychiatric disorders. All participants had withdrawal and termination criteria: Withdrawal criteria included voluntary withdrawal of informed consent and researcher judgment of unsuitability to continue. Termination criteria involved non-cooperation leading to data invalidation, exclusion from final data analysis, and discontinuation of further investigation.

MRI images were acquired using an Achieva 3T MRI scanner (GE, SIGNA Architect) equipped with a 48-channel head coil. Participants were instructed to stay awake, remain motionless, relax, and keep their eyes closed during the scanning procedure. To minimize head movement and reduce scan noise, foam padding and soft earplugs were provided. All scans were performed by two licensed MRI technicians with intermediate professional titles

in the MRI room. T1\_3D data sets were acquired with a maximum TR, minimum TE, a NEX of 1, a layer thickness of 2mm, and a field of view of  $256 \times 256 \text{ mm}^2$ . Scan time = 7 minutes. For rs-fMRI, a TR of 2000ms, a TE of 30ms, a FOV of  $220\text{mm} \times 220\text{mm}$ , a flip angle of  $90^\circ$ , a matrix of  $64 \times 64$ , a resolution of  $3 \times 3 \times 3$ , a slice thickness of 36, and 240 time points were acquired. Scan time = 9 minutes.

The demographics were shown in **Table 1**. And the quality control could be seen in **S-Figure 1**.

*Table1 Demography (HAMD means Hamilton Depression Rating Scale, YMRS means Young Mania Rating Scale, PDQ means Perceived Disability Questionnaire, HAMA means Hamilton Anxiety Scale)*

|                 | <i>Age</i>      | <i>Sex(M/F)</i> | <i>handness<br/>(R/L)</i> | <i>HAMD</i>                              | <i>YMRS</i>                              | <i>PDQ</i>                              | <i>HAMA</i>                              |
|-----------------|-----------------|-----------------|---------------------------|------------------------------------------|------------------------------------------|-----------------------------------------|------------------------------------------|
| <i>rBD</i>      | <i>24.3±6.5</i> | <i>17/20</i>    | <i>37/0</i>               | <i>6.5±2.7</i>                           | <i>12.2±4.8</i>                          | <i>34.78±8.97</i>                       | <i>12.18±4.75</i>                        |
| <i>BipD</i>     | <i>21.9±5.2</i> | <i>15/27</i>    | <i>42/0</i>               | <i>22.6±3.3</i>                          | <i>17.9±7.0</i>                          | <i>45.43±13.25</i>                      | <i>24.88±7.81</i>                        |
| <i>BipM</i>     | <i>24.9±6.4</i> | <i>21/17</i>    | <i>38/0</i>               | <i>5.6±0.8</i>                           | <i>24.9±7.8</i>                          | <i>31.25±12.17</i>                      | <i>17.87±6.97</i>                        |
| <i>HC</i>       | <i>26.7±7.3</i> | <i>14/21</i>    | <i>35/0</i>               | -----                                    | -----                                    | -----                                   | -----                                    |
| <i>F values</i> | <i>0.0307</i>   | <i>0.0054</i>   | -----                     | <i>321.05</i>                            | <i>111.61</i>                            | <i>15.67</i>                            | <i>35.67</i>                             |
| <i>p values</i> | <i>0.96</i>     | <i>0.98</i>     | -----                     | <i><math>1.46 \times 10^{-47}</math></i> | <i><math>1.42 \times 10^{-27}</math></i> | <i><math>9.75 \times 10^{-7}</math></i> | <i><math>9.32 \times 10^{-13}</math></i> |

### *Data preprocessing and Functional connectome*

For all datasets, raw DICOM files were converted to Brain Imaging Data Structure (BIDS) format using HeuDiConv v0.13.1 . The structural and functional preprocessing of both Bipolar were performed with fMRIPrep 23.0.2 (Esteban et al., 2019), which is based on Nipype 1.8.6 (Gorgolewski et al., 2011). The main anatomical data preprocessing steps include intensity normalization, brain extraction, tissue segmentation, surface reconstruction, and spatial normalization. The main functional data preprocessing steps include head motion correction, slice-time correction, and co-registration. For original preprocessing details generated by fMRIPrep. The derived functional time series were parcellated into the Schaefer 200x7 atlas and underwent a confound removal process implemented in Nilearn . The confound removal process adopted the “simple” strategy from (H.-T. Wang et al., 2024), including high-pass filtering, motion and tissue signals removal, detrending, and z-scoring. Functional connectivity matrices were then estimated for each subject using zero-lag Pearson correlation coefficient.

### *Functional organization gradients*

We initially generated cortex-wide functional connectome gradients utilizing BrainSpace (version 0.1.10; <https://github.com/MICA-MNI/BrainSpace>) with default parameters. Consistent with prior study (Vos de Wael et al., 2020), we retained the top 10% of weighted connections per region following z-transformation of the data to return more robust gradient loadings (Margulies et al., 2016). To capture the similarity in connectivity profiles between regions, we constructed an affinity matrix using a cosine similarity (Vos de Wael et al., 2020). We employed diffusion map embedding , a robust non-linear manifold learning technique to identify low-dimensional representations from high dimensional functional connectome for each individual (Vos de Wael et al., 2020). We extracted the first 10 components but used the first one in this study to focus on the sensory-association axis. Then individual-level gradient maps were aligned to template gradients generated from 100 unrelated healthy adults from the human connectome project database using Procrustes rotation (Wan et al., 2022) .

To estimate reorganization of functional hierarchy across various BD episodes, we implemented independent *two-sample t*-tests to compare the functional organization pattern between rBD/BipD/BipM and healthy control (HC) respectively with age and sex as covariates. We employed False Discovery Rate (*FDR*,  $q < 5\%$ ) to consider the multiple comparisons correction. Furthermore, we defined the *t*-maps as the reorganization maps for rBD, BipD, and BipM, respectively.

### *Cognition decoding for functional reorganization*

We then further estimated the cognition relevance of functional reorganization patterns among different episodes of bipolar disorder using NeuroSynth (Yarkoni et al., 2011). We used twenty cognition maps from previous study (Margulies et al., 2016) and correlated them with functional gradient difference maps between BD episodes and HC via Pearson's correlation. Finally, we visualized cognition terms according to these correlation values.

### *The asymmetry of functional gradients.*

To quantify the differences between the left and right hemispheres, we calculated functional gradients for each hemisphere respectively. We employed the asymmetry index (AI) (Wan et al., 2022). Additionally, we computed the normalized AI using the formula  $(\text{left} - \text{right}) / (\text{left} + \text{right})$ . For intra-hemispheric patterns, the AI was calculated using  $(\text{LL} - \text{RR}) / (\text{LL} + \text{RR})$ . A positive AI-score indicated leftward dominance of hemispheric features, while a negative AI-score indicated rightward dominance. Then we compared the AI score of functional gradient between rBD/BipD/BipM and HC via *two-sample ttest*, with age and sex as covariates.

### *Functional hierarchy direction across various episodes of bipolar disorder*

To further examine the directional functional flow on reorganization regions, we employed regression dynamic causal modeling (rDCM) to parcellation preprocessed time sequence of each subject. rDCM is a computationally efficient framework expanding upon from classical dynamic causal modeling (DCM) framework. Compared with the original CDM, rDCM was designed to be more data-driven and implemented linear hemodynamic response function and mean-field approximation among various regions. A more detailed description of rDCM could be found elsewhere (Frässle et al., 2018, Frässle et al., 2017). Specifically, we fit parcellation-level time series from preprocess rs-fMRI via TAPAS (<https://www.tnu.ethz.ch/de/software/tapas>) to obtain whole-brain effective connectome estimation (200×200 matrix) for each individual. To simplify directional information of resting state on the whole cortex, we estimated the weighted outward and weighted inward degree, reflecting outward and inward signal flows from specific regions respectively. To simplify the interpretation of cortical flow across functional hierarchy, we further averaged



the weighted outward and inward degree in previous significant regions in sensory regions and association regions respectively and compared them via *two-sample ttest*.

#### *functional integration and separation of cortex-wide connectome*

We applied the Nested Spectral Partitioning (NSP) based on the eigenmodes method to detect hierarchical modules as well as quantify capacity for functional segregation and integration in FC networks. Differing from clustering and modularity-maximization methods, NSP method is based on a physical principle where regions with the same eigenvector sign are considered cooperatively activated, and regions with different signs are considered oppositely activated (R. Wang et al., 2022). Specifically, using spectral graph theory, the Laplacian matrix of whole-brain functional connectivity matrix is computed, and its eigenvalues and eigenvectors are utilized to perform an initial partition of the whole-brain functional network. This spectral partitioning minimizes the cut edges between regions, defining the initial functional modules. Based on this initial partitioning, each subnetwork is further partitioned in a nested manner, recursively continuing this process until a predetermined partitioning scale or other termination criteria are met. At each level of partitioning, the strength of connections within each subnetwork (reflecting segregation) and between subnetworks (reflecting integration) are calculated (R. Wang et al., 2022). These metrics quantify the segregation and integration of the brain's functional network at different hierarchical levels. It is noteworthy that the NSP method is influenced by the length of the signal used to construct functional connectivity. However, in this study, the resting-state data collection duration for each subject was consistent.

Finally, we evaluated the segregation and integration coefficients of whole-brain functional connectivity for each individual and used a one-way-anova and post-hoc analysis to compare those coefficients' differences between the disease group and the healthy control group with age and sex as covariates.

#### *Functional reorganization and clinical symptom association*

To explore clinical symptoms of functional reorganization, we further linked functional gradient values to clinical symptom estimation. We averaged functional gradient values in previous significant regions in sensory regions and association regions respectively. Then, we calculated Pearson's correlation between gradient alteration in BipM,rBD, BipD with YMRS,HRSD,HAMA, and PDQ respectively.

### *Heritability of functional hierarchy*

Next, we estimated functional gradients from heritability, which reflect biological robustness determined by behavioral genetics. To do so, we utilized the Human Connectome Project (HCP) S1200 data release for a large sample size of the healthy adult population (Elam et al., 2021). This dataset comprises four sessions of resting-state functional magnetic resonance imaging (rs-fMRI) scans from 1206 healthy young adults, along with pedigree information, including 298 monozygotic and 188 dizygotic twins, as well as 720 singletons. We specifically selected individuals with a complete set of four fMRI scans that met the HCP quality assessment criteria. Ultimately, our sample encompassed 1014 subjects (470 males) with an average age of 28.7 years (range: 22–37).

To map the heritability of functional gradients in humans, we used the Sequential Oligogenic Linkage Analysis Routines (SOLAR, v8.5.1b) (Almasy & Blangero, 1998). In brief, heritability indicates the impact of genetic relatedness on a phenotype of interest. SOLAR uses maximum likelihood variance decomposition methods to determine the relative importance of familial and environmental influences on a phenotype by modeling the covariance among family members as a function of genetic proximity. Heritability (i.e. narrow-sense heritability  $h^2$ ) represents the proportion of the phenotypic variance accounted for by the total additive genetic variance. Phenotypes exhibiting stronger covariances between genetically more similar individuals than between genetically less similar individuals have higher heritability. In this study, we quantified the heritability of functional gradients. We added covariates to our models including age, sex, age<sup>2</sup>, and age×sex. We calculated heritability in all two sessions and averaged them as final heritability.

### *Molecular mechanism of functional reorganization*

#### *Functional reorganization and Receptor maps*

Receptor densities were assessed through the utilization of PET tracer investigations encompassing a total of 18 receptors and transporters spanning nine neurotransmitter systems. This data, recently shared by Hansen and colleagues ([https://github.com/netneurolab/hansen\\_receptors](https://github.com/netneurolab/hansen_receptors)) (Hansen et al., 2022a). The neurotransmitter systems include dopamine (D1, D2 DAT), norepinephrine (NET), serotonin (5-HT1A, 5-HT1B, 5-HT2, 5-HT4, 5-HT6, 5-HTT), acetylcholine  $\alpha\beta_2$ , M1, VAcHT), glutamate (mGluR5), GABA (GABAa), histamine (H3), cannabinoid (CB1), and opioid (MOR)(Markello et al., 2022). Volumetric PET images were aligned with the MNI-ICBM 152 nonlinear 2009 (version c, asymmetric) template. These images, averaged across

participants within each study, were subsequently parcellated into the Schaefer 200 template. Receptors/transporters exhibiting more than one mean image of the same tracer (5-HT1B, D2, VACHT) were amalgamated using a weighted average (Hansen et al., 2022a).

### *Functional reorganization and Cellular maps*

Here, we further correlated patterns observed in three episodes of bipolar disorder with 24 cellular maps from a previous study (X.-H. Zhang et al., 2023). The molecular signature profiles of all cell classes were constructed from snDrop-seq samples provided by (Jorstad et al., 2023). Then cell type fractions were deconvolved from microarray samples downloaded from Allen Human Brain Atlas (AHBA; <http://human.brain-map.org/>)(Shen et al., 2012). The 24 cell types are Lamp5, Pax6, Vip, Sncg, Lamp5, Lhx6, L5ET, L5/L6 NP, L6 CT, L6b, Astro, VLMC, Endo, Micro/PVM, Oligo, OPC, L2/3 IT, L6 IT Car3, L4 IT, L6 IT, L5 IT, Chandelier, Pvalb, Sst, and Sst Chodl, as detailed in (X.-H. Zhang et al., 2023).

### *Null model*

In our study, we aimed to explore the topographic correlations between functional reorganization patterns and other notable features. To infer these correlations, we implemented a null model that systematically disrupted the relationship between two topographic maps while maintaining their spatial autocorrelation (Markello & Misic, 2021). Initially, we shuffled receptor maps or cellular maps and examined their relationship with functional reorganization patterns. The resulting spatial coordinates provided the basis for generating null models through a process of randomly sampled rotations and reassignment of node values based on the nearest resulting parcel (Hansen et al., 2022b). This process was iterated 1000 times. Importantly, the rotation was first applied to one hemisphere and then mirrored onto the other. The threshold value was determined by the 95th percentile of shuffling occurrence frequencies derived from spatial null models.

### DATA AVAILABILITY

The clinical data could be accessed according to reasonable requests for corresponding authors. The raw fMRI data and MRI data for HCP was available on <https://db.humanconnectome.org/>. Heritability analyses were performed using Solar Eclipse 8.5.1b (<https://www.solar-eclipse-genetics.org>). Neuromap was available on (<https://netneurolab.github.io/neuromaps/usage.html>), ENIGMA toolbox was available on (<https://enigma-toolbox.readthedocs.io/en/latest/pages.html>).

#### CODE AVAILABILITY

Code will be available on [https://github.com/Laoma29/Publication\\_codes](https://github.com/Laoma29/Publication_codes).

#### ACKNOWLEDGMENTS

Xiaobo Liu, Siyu Long, Jiadong Yan and Ke Xie are supported by the China Scholarship Council. Bin Wan is supported by International Max Planck Research School on Neuroscience of Communication: Function, Structure, and Plasticity (IMPRS NeuroCom), Graduate Academy Leipzig, and Mitacs Globalink Research Award. ZQL acknowledges support from the Fonds de Recherche du Qu'bec -- Nature et Technologies (FRQNT). Yujun Gao is supported by the Health of Hubei Province Scientific Research Project under Grant 2020Cfb512, and by the Mental Health Research Institute of Three Gorges University: YCXL-23-11.

#### COMPETING INTERESTS

No competing interests among the authors.

## Reference

- Alamian, G., Hincapié, A.-S., Combrisson, E., Thiery, T., Martel, V., Althukov, D., & Jerbi, K. (2017). Alterations of Intrinsic Brain Connectivity Patterns in Depression and Bipolar Disorders: A Critical Assessment of Magnetoencephalography-Based Evidence. *Frontiers in Psychiatry*, 8. <https://doi.org/10.3389/fpsy.2017.00041>
- Almasy, L., & Blangero, J. (1998). Multipoint quantitative-trait linkage analysis in general pedigrees. *The American Journal of Human Genetics*, 62(5), 1198–1211.
- Amorim, P. (2000). Mini International Neuropsychiatric Interview (MINI): Validação de entrevista breve para diagnóstico de transtornos mentais. *Brazilian Journal of Psychiatry*, 22, 106–115.
- Association, A. P. & others. (2000). Diagnostic and statistical manual of mental disorders. *Text Revision*.
- Basco, M. R., & Rush, A. J. (2005). *Cognitive-behavioral therapy for bipolar disorder*. Guilford Press.
- Bearden, C. E., Glahn, D. C., Monkul, E. S., Barrett, J., Najt, P., Villarreal, V., & Soares, J. C. (2006). Patterns of memory impairment in bipolar disorder and unipolar major depression. *Psychiatry Research*, 142(2–3), 139–150.
- Bockaert, J., Claeysen, S., Compan, V., & Dumuis, A. (2008). 5-HT<sub>4</sub> receptors: History, molecular pharmacology and brain functions. *Neuropharmacology*, 55(6), 922–931.
- Breukelaar, I. A., Erlinger, M., Harris, A., Boyce, P., Hazell, P., Grieve, S. M., Antees, C., Foster, S., Gomes, L., Williams, L. M., & others. (2020). Investigating the neural basis of cognitive control dysfunction in mood disorders. *Bipolar Disorders*, 22(3), 286–295.
- Buckner, R. L., Sepulcre, J., Talukdar, T., Krienen, F. M., Liu, H., Hedden, T., Andrews-Hanna, J. R., Sperling, R. A., & Johnson, K. A. (2009). Cortical Hubs Revealed by Intrinsic Functional Connectivity: Mapping, Assessment of Stability, and Relation to Alzheimer's Disease. *Journal of Neuroscience*, 29(6), 1860–1873.

<https://doi.org/10.1523/JNEUROSCI.5062-08.2009>

Chang, Z., Wang, X., Wu, Y., Lin, P., & Wang, R. (2023). Segregation, integration and balance in resting-state brain functional networks associated with bipolar disorder symptoms. *Human Brain Mapping, 44*(2), 599–611.

<https://doi.org/10.1002/hbm.26087>

Costa, R. T. da, Rangé, B. P., Malagris, L. E. N., Sardinha, A., Carvalho, M. R. de, & Nardi, A. E. (2010). Cognitive–behavioral therapy for bipolar disorder. *Expert Review of Neurotherapeutics, 10*(7), 1089–1099. <https://doi.org/10.1586/ern.10.75>

Cousins, D. A., Butts, K., & Young, A. H. (2009). The role of dopamine in bipolar disorder. *Bipolar Disorders, 11*(8), 787–806.

Dong, D., Luo, C., Guell, X., Wang, Y., He, H., Duan, M., Eickhoff, S. B., & Yao, D. (2020). Compression of Cerebellar Functional Gradients in Schizophrenia. *Schizophrenia Bulletin, 46*(5), 1282–1295. <https://doi.org/10.1093/schbul/sbaa016>

Elam, J. S., Glasser, M. F., Harms, M. P., Sotiropoulos, S. N., Andersson, J. L., Burgess, G. C., Curtiss, S. W., Oostenveld, R., Larson-Prior, L. J., Schoffelen, J.-M., & others. (2021). The human connectome project: A retrospective. *NeuroImage, 244*, 118543.

Esteban, O., Markiewicz, C. J., Blair, R. W., Moodie, C. A., Isik, A. I., Erramuzpe, A., Kent, J. D., Goncalves, M., DuPre, E., Snyder, M., & others. (2019). fMRIPrep: A robust preprocessing pipeline for functional MRI. *Nature Methods, 16*(1), 111–116.

Fountoulakis, K. N., Grunze, H., Vieta, E., Young, A., Yatham, L., Blier, P., Kasper, S., & Moeller, H. J. (2017). The International College of Neuro-Psychopharmacology (CINP) Treatment Guidelines for Bipolar Disorder in Adults (CINP-BD-2017), Part 3: The Clinical Guidelines. *International Journal of Neuropsychopharmacology, 20*(2), 180–195. <https://doi.org/10.1093/ijnp/pyw109>

Frässle, S., Harrison, S. J., Heinzle, J., Clementz, B. A., Tamminga, C. A., Sweeney, J. A., Gershon, E. S., Keshavan, M. S., Pearlson, G. D., Powers, A., & Stephan, K. E. (2021). Regression dynamic causal modeling for resting-state fMRI. *Human Brain Mapping, 42*(7), 2159–2180. <https://doi.org/10.1002/hbm.25357>

- Goes, F. S. (2023). Diagnosis and management of bipolar disorders. *BMJ*, *381*, e073591.  
<https://doi.org/10.1136/bmj-2022-073591>
- Gorgolewski, K., Burns, C. D., Madison, C., Clark, D., Halchenko, Y. O., Waskom, M. L., & Ghosh, S. S. (2011). Nipype: A flexible, lightweight and extensible neuroimaging data processing framework in python. *Frontiers in Neuroinformatics*, *5*, 13.
- Grande, I., Berk, M., Birmaher, B., & Vieta, E. (2016a). Bipolar disorder. *The Lancet*, *387*(10027), 1561–1572. [https://doi.org/10.1016/S0140-6736\(15\)00241-X](https://doi.org/10.1016/S0140-6736(15)00241-X)
- Grande, I., Berk, M., Birmaher, B., & Vieta, E. (2016b). Bipolar disorder. *The Lancet*, *387*(10027), 1561–1572. [https://doi.org/10.1016/S0140-6736\(15\)00241-X](https://doi.org/10.1016/S0140-6736(15)00241-X)
- Hansen, J. Y., Shafiei, G., Markello, R. D., Smart, K., Cox, S. M. L., Nørgaard, M., Beliveau, V., Wu, Y., Gallezot, J.-D., Aumont, É., Servaes, S., Scala, S. G., DuBois, J. M., Wainstein, G., Bezgin, G., Funck, T., Schmitz, T. W., Spreng, R. N., Galovic, M., ... Masic, B. (2022a). Mapping neurotransmitter systems to the structural and functional organization of the human neocortex. *Nature Neuroscience*, *25*(11), 1569–1581.  
<https://doi.org/10.1038/s41593-022-01186-3>
- Hansen, J. Y., Shafiei, G., Markello, R. D., Smart, K., Cox, S. M. L., Nørgaard, M., Beliveau, V., Wu, Y., Gallezot, J.-D., Aumont, É., Servaes, S., Scala, S. G., DuBois, J. M., Wainstein, G., Bezgin, G., Funck, T., Schmitz, T. W., Spreng, R. N., Galovic, M., ... Masic, B. (2022b). Mapping neurotransmitter systems to the structural and functional organization of the human neocortex. *Nature Neuroscience*, *25*(11), 1569–1581.  
<https://doi.org/10.1038/s41593-022-01186-3>
- Homberg, J. R., & van den Hove, D. L. (2012). The serotonin transporter gene and functional and pathological adaptation to environmental variation across the life span. *Progress in Neurobiology*, *99*(2), 117–127.
- Hong, S.-J., Vos de Wael, R., Bethlehem, R. A. I., Lariviere, S., Paquola, C., Valk, S. L., Milham, M. P., Di Martino, A., Margulies, D. S., Smallwood, J., & Bernhardt, B. C. (2019). Atypical functional connectome hierarchy in autism. *Nature Communications*, *10*(1), 1022. <https://doi.org/10.1038/s41467-019-08944-1>



- Hupfeld, K. E., McGregor, H. R., Reuter-Lorenz, P. A., & Seidler, R. D. (2021). Microgravity effects on the human brain and behavior: Dysfunction and adaptive plasticity. *Neuroscience & Biobehavioral Reviews*, *122*, 176–189.  
<https://doi.org/10.1016/j.neubiorev.2020.11.017>
- Jorstad, N. L., Close, J., Johansen, N., Yanny, A. M., Barkan, E. R., Travaglini, K. J., Bertagnolli, D., Campos, J., Casper, T., Crichton, K., Dee, N., Ding, S.-L., Gelfand, E., Goldy, J., Hirschstein, D., Kiick, K., Kroll, M., Kunst, M., Lathia, K., ... Lein, E. S. (2023). Transcriptomic cytoarchitecture reveals principles of human neocortex organization. *Science*, *382*(6667), eadf6812. <https://doi.org/10.1126/science.adf6812>
- Kikkawa, T., Casingal, C. R., Chun, S. H., Shinohara, H., Hiraoka, K., & Osumi, N. (2019). The role of *Pax6* in brain development and its impact on pathogenesis of autism spectrum disorder. *Brain Research*, *1705*, 95–103.  
<https://doi.org/10.1016/j.brainres.2018.02.041>
- Koban, L., Gianaros, P. J., Kober, H., & Wager, T. D. (2021). The self in context: Brain systems linking mental and physical health. *Nature Reviews Neuroscience*, *22*(5), 309–322. <https://doi.org/10.1038/s41583-021-00446-8>
- Lei, W., Xiao, Q., Wang, C., Cai, Z., Lu, G., Su, L., & Zhong, Y. (2023). The disruption of functional connectome gradient revealing networks imbalance in pediatric bipolar disorder. *Journal of Psychiatric Research*, *164*, 72–79.
- Lin, S., Zhang, C., Zhang, Y., Chen, S., Lin, X., Peng, B., Xu, Z., Hou, G., & Qiu, Y. (2023). Shared and specific neurobiology in bipolar disorder and unipolar disorder: Evidence based on the connectome gradient and a transcriptome–connectome association study. *Journal of Affective Disorders*, *341*, 304–312.  
<https://doi.org/10.1016/j.jad.2023.08.139>
- Liu, X., Liu, Z.-Q., Wan, B., Liu, L., Xiao, J., Meng, Y., Weng, C., & Gao, Y. (2024). *Common and Specific Intrinsic Functional Network Related to Episode Dynamics during Treatment in Bipolar Spectrum* (p. 2024.04.28.24306505). medRxiv.  
<https://doi.org/10.1101/2024.04.28.24306505>



- Ljubic, N., Ueberberg, B., Grunze, H., & Assion, H.-J. (2023). Treatment of Bipolar Disorders in Older Adults: A Review. *Focus*, 21(4), 434–443.  
<https://doi.org/10.1176/appi.focus.23021024>
- Lyoo, I. K., Sung, Y. H., Dager, S. R., Friedman, S. D., Lee, J.-Y., Kim, S. J., Kim, N., Dunner, D. L., & Renshaw, P. F. (2006). Regional cerebral cortical thinning in bipolar disorder. *Bipolar Disorders*, 8(1), 65–74.
- Margulies, D. S., Ghosh, S. S., Goulas, A., Falkiewicz, M., Huntenburg, J. M., Langs, G., Bezgin, G., Eickhoff, S. B., Castellanos, F. X., Petrides, M., Jefferies, E., & Smallwood, J. (2016). Situating the default-mode network along a principal gradient of macroscale cortical organization. *Proceedings of the National Academy of Sciences*, 113(44), 12574–12579. <https://doi.org/10.1073/pnas.1608282113>
- Markello, R. D., Hansen, J. Y., Liu, Z.-Q., Bazinet, V., Shafiei, G., Suárez, L. E., Blostein, N., Seidlitz, J., Baillet, S., Satterthwaite, T. D., Chakravarty, M. M., Raznahan, A., & Masic, B. (2022). neuromaps: Structural and functional interpretation of brain maps. *Nature Methods*, 19(11), 1472–1479. <https://doi.org/10.1038/s41592-022-01625-w>
- Markello, R. D., & Masic, B. (2021). Comparing spatial null models for brain maps. *NeuroImage*, 236, 118052. <https://doi.org/10.1016/j.neuroimage.2021.118052>
- Mederos, S., & Perea, G. (2019). GABAergic-astrocyte signaling: A refinement of inhibitory brain networks. *Glia*, 67(10), 1842–1851. <https://doi.org/10.1002/glia.23644>
- Nan, X., Li, W., & Wang, L. (2024). Functional magnetic resonance imaging studies in bipolar disorder in resting state: A coordinates-based meta-analysis. *Psychiatry Research: Neuroimaging*, 344, 111869. <https://doi.org/10.1016/j.psychresns.2024.111869>
- Nierenberg, A. A., Agustini, B., Köhler-Forsberg, O., Cusin, C., Katz, D., Sylvia, L. G., Peters, A., & Berk, M. (2023). Diagnosis and Treatment of Bipolar Disorder: A Review. *JAMA*, 330(14), 1370–1380. <https://doi.org/10.1001/jama.2023.18588>
- Northoff, G., & Hirjak, D. (2024). Is depression a global brain disorder with topographic dynamic reorganization? *Translational Psychiatry*, 14(1), 1–12.  
<https://doi.org/10.1038/s41398-024-02995-9>

- Paquola, C., Seidlitz, J., Benkarim, O., Royer, J., Klimes, P., Bethlehem, R. A. I., Larivière, S., Wael, R. V. de, Rodríguez-Cruces, R., Hall, J. A., Frauscher, B., Smallwood, J., & Bernhardt, B. C. (2020). A multi-scale cortical wiring space links cellular architecture and functional dynamics in the human brain. *PLOS Biology*, *18*(11), e3000979.  
<https://doi.org/10.1371/journal.pbio.3000979>
- Pasquini, L., Fryer, S. L., Eisendrath, S. J., Segal, Z. V., Lee, A. J., Brown, J. A., Saggar, M., & Mathalon, D. H. (2023). Dysfunctional Cortical Gradient Topography in Treatment-Resistant Major Depressive Disorder. *Biological Psychiatry: Cognitive Neuroscience and Neuroimaging*, *8*(9), 928–939.  
<https://doi.org/10.1016/j.bpsc.2022.10.009>
- Phillips, M. L., & Kupfer, D. J. (2013). Bipolar disorder diagnosis: Challenges and future directions. *The Lancet*, *381*(9878), 1663–1671.  
[https://doi.org/10.1016/S0140-6736\(13\)60989-7](https://doi.org/10.1016/S0140-6736(13)60989-7)
- Phillips, M. L., & Swartz, H. A. (2014). A critical appraisal of neuroimaging studies of bipolar disorder: Toward a new conceptualization of underlying neural circuitry and a road map for future research. *American Journal of Psychiatry*, *171*(8), 829–843.
- Qin, S., Young, C. B., Supekar, K., Uddin, L. Q., & Menon, V. (2012). Immature integration and segregation of emotion-related brain circuitry in young children. *Proceedings of the National Academy of Sciences*, *109*(20), 7941–7946.
- Rihmer, Z., & Kiss, K. (2002). Bipolar disorders and suicidal behaviour. *Bipolar Disorders*, *4*, 21–25.
- Romand, S., Wang, Y., Toledo-Rodriguez, M., & Markram, H. (2011). Morphological Development of Thick-Tufted Layer V Pyramidal Cells in the Rat Somatosensory Cortex. *Frontiers in Neuroanatomy*, *5*. <https://doi.org/10.3389/fnana.2011.00005>
- Russo, D., Martino, M., Magioncalda, P., Inglese, M., Amore, M., & Northoff, G. (2020). Opposing Changes in the Functional Architecture of Large-Scale Networks in Bipolar Mania and Depression. *Schizophrenia Bulletin*, *46*(4), 971–980.  
<https://doi.org/10.1093/schbul/sbaa004>

- Schmitt, C. M., & Schoen, S. (2022). Interoception: A Multi-Sensory Foundation of Participation in Daily Life. *Frontiers in Neuroscience*, *16*.  
<https://doi.org/10.3389/fnins.2022.875200>
- Sears, S. M., & Hewett, S. J. (2021). Influence of glutamate and GABA transport on brain excitatory/inhibitory balance. *Experimental Biology and Medicine*, *246*(9), 1069–1083. <https://doi.org/10.1177/1535370221989263>
- Shen, E. H., Overly, C. C., & Jones, A. R. (2012). The Allen Human Brain Atlas: Comprehensive gene expression mapping of the human brain. *Trends in Neurosciences*, *35*(12), 711–714. <https://doi.org/10.1016/j.tins.2012.09.005>
- Sporns, O. (2013). Network attributes for segregation and integration in the human brain. *Current Opinion in Neurobiology*, *23*(2), 162–171.
- Strakowski, S. M., Adler, C. M., Almeida, J., Altshuler, L. L., Blumberg, H. P., Chang, K. D., DelBello, M. P., Frangou, S., McIntosh, A., Phillips, M. L., Sussman, J. E., & Townsend, J. D. (2012). The functional neuroanatomy of bipolar disorder: A consensus model. *Bipolar Disorders*, *14*(4), 313–325.  
<https://doi.org/10.1111/j.1399-5618.2012.01022.x>
- Sun, S., Yang, P., Chen, H., Shao, X., Ji, S., Li, X., Li, G., & Hu, B. (2022). Electroconvulsive therapy-induced changes in functional brain network of major depressive disorder patients: A longitudinal resting-state electroencephalography study. *Frontiers in Human Neuroscience*, *16*, 852657.
- Thermenos, H. W., Goldstein, J. M., Milanovic, S. M., Whitfield-Gabrieli, S., Makris, N., LaViolette, P., Koch, J. K., Faraone, S. V., Tsuang, M. T., Buka, S. L., & Seidman, L. J. (2010). An fMRI study of working memory in persons with bipolar disorder or at genetic risk for bipolar disorder. *American Journal of Medical Genetics Part B: Neuropsychiatric Genetics*, *153B*(1), 120–131. <https://doi.org/10.1002/ajmg.b.30964>
- Thirthalli, J., Prasad, M. K., & Gangadhar, B. N. (2012). Electroconvulsive therapy (ECT) in bipolar disorder: A narrative review of literature. *Asian Journal of Psychiatry*, *5*(1), 11–17. <https://doi.org/10.1016/j.ajp.2011.12.002>

- Townsend, J., & Altshuler, L. L. (2012). Emotion processing and regulation in bipolar disorder: A review. *Bipolar Disorders*, *14*(4), 326–339.
- van den Heuvel, M. P., & Sporns, O. (2019). A cross-disorder connectome landscape of brain dysconnectivity. *Nature Reviews Neuroscience*, *20*(7), 435–446.  
<https://doi.org/10.1038/s41583-019-0177-6>
- Vázquez-Rodríguez, B., Suárez, L. E., Markello, R. D., Shafiei, G., Paquola, C., Hagmann, P., Van Den Heuvel, M. P., Bernhardt, B. C., Spreng, R. N., & Misic, B. (2019). Gradients of structure–function tethering across neocortex. *Proceedings of the National Academy of Sciences*, *116*(42), 21219–21227.
- Viveros, M.-P., Marco, E.-M., Llorente, R., & Lopez-Gallardo, M. (2007). Endocannabinoid system and synaptic plasticity: Implications for emotional responses. *Neural Plasticity*, *2007*(1), 052908.
- Vos de Wael, R., Benkarim, O., Paquola, C., Lariviere, S., Royer, J., Tavakol, S., Xu, T., Hong, S.-J., Langs, G., Valk, S., Misic, B., Milham, M., Margulies, D., Smallwood, J., & Bernhardt, B. C. (2020). BrainSpace: A toolbox for the analysis of macroscale gradients in neuroimaging and connectomics datasets. *Communications Biology*, *3*(1), 1–10. <https://doi.org/10.1038/s42003-020-0794-7>
- Waller, J., Miao, T., Ikedionwu, I., & Lin, K. K. (2021). Reviewing applications of structural and functional MRI for bipolar disorder. *Japanese Journal of Radiology*, *39*(5), 414–423. <https://doi.org/10.1007/s11604-020-01074-5>
- Wan, B., Bayrak, Ş., Xu, T., Schaare, H. L., Bethlehem, R. A., Bernhardt, B. C., & Valk, S. L. (2022). Heritability and cross-species comparisons of human cortical functional organization asymmetry. *Elife*, *11*, e77215.
- Wang, H.-T., Meisler, S. L., Sharmarke, H., Clarke, N., Gensollen, N., Markiewicz, C. J., Paugam, F., Thirion, B., & Bellec, P. (2024). Continuous evaluation of denoising strategies in resting-state fMRI connectivity using fMRIPrep and Nilearn. *PLOS Computational Biology*, *20*(3), e1011942.
- Wang, R., Zhen, S., Zhou, C., & Yu, R. (2022). Acute stress promotes brain network

integration and reduces state transition variability. *Proceedings of the National Academy of Sciences*, 119(24), e2204144119.

Wu, Y.-K., Su, Y.-A., Zhu, L.-L., Li, J.-T., Li, Q., Dai, Y.-R., Lin, J.-Y., Li, K., & Si, T.-M. (2023).

Intrinsic functional connectivity correlates of cognitive deficits involving sustained attention and executive function in bipolar disorder. *BMC Psychiatry*, 23(1), 584.

Xia, M., Liu, J., Mechelli, A., Sun, X., Ma, Q., Wang, X., Wei, D., Chen, Y., Liu, B., Huang, C.-C., Zheng, Y., Wu, Y., Chen, T., Cheng, Y., Xu, X., Gong, Q., Si, T., Qiu, S., Lin, C.-P., ... He, Y. (2022). Connectome gradient dysfunction in major depression and its association with gene expression profiles and treatment outcomes. *Molecular Psychiatry*, 27(3), 1384–1393. <https://doi.org/10.1038/s41380-022-01519-5>

Yarkoni, T., Poldrack, R. A., Nichols, T. E., Van Essen, D. C., & Wager, T. D. (2011).

Large-scale automated synthesis of human functional neuroimaging data. *Nature Methods*, 8(8), 665–670.

Yeo, B. T. T., Krienen, F. M., Sepulcre, J., Sabuncu, M. R., Lashkari, D., Hollinshead, M., Roffman, J. L., Smoller, J. W., Zöllei, L., Polimeni, J. R., Fischl, B., Liu, H., & Buckner, R. L. (2011). The organization of the human cerebral cortex estimated by intrinsic functional connectivity. *Journal of Neurophysiology*.  
<https://doi.org/10.1152/jn.00338.2011>

Young, R. C., Biggs, J. T., Ziegler, V. E., & Meyer, D. A. (1978). A rating scale for mania: Reliability, validity and sensitivity. *The British Journal of Psychiatry: The Journal of Mental Science*, 133, 429–435. <https://doi.org/10.1192/bjp.133.5.429>

Zhang, L., Wu, H., Zhang, A., Bai, T., Ji, G.-J., Tian, Y., & Wang, K. (2021). Aberrant brain network topology in the frontoparietal-limbic circuit in bipolar disorder: A graph-theory study. *European Archives of Psychiatry and Clinical Neuroscience*, 1–13.

Zhang, X.-H., Anderson, K. M., Dong, H.-M., Chopra, S., Dhamala, E., Emani, P. S., Margulies, D., & Holmes, A. J. (2023). The Cellular Underpinnings of the Human Cortical Connectome. *bioRxiv*.

## Supplementary Materials

### Functional Reorganization across Three Episodes in Bipolar Disorder

Xiaobo Liu <sup>1,2+</sup>, Bin Wan <sup>3,4+</sup>, Ruiyang Ge <sup>5</sup>, Zhen-Qi Liu <sup>2</sup>, Ruifang Cui <sup>6</sup>, Jinming Xiao <sup>6</sup>, Xihan Zhang <sup>7</sup>, Lang Liu <sup>8</sup>, Siyu Long <sup>2</sup>, Jiadong Yan <sup>2</sup>, Ke Xie <sup>2</sup>, Geng Liu <sup>2</sup>, Meng Yao <sup>6</sup>, Xiaoqiang Liu<sup>9</sup>, Sanwang Wang<sup>10</sup>, Yujun Gao <sup>1\*</sup>

1 Department of Psychiatry, Wuhan Wuchang Hospital, Wuhan University of Science and Technology, Wuhan, China

2 McConnell Brain Imaging Centre, Montreal Neurological Institute, McGill University, Montreal, Canada

3 Max Planck Institute for Human Cognitive and Brain Sciences, Leipzig, Germany

4 Institute of Neuroscience and Medicine (INM-7: Brain and Behavior), Research Center Jülich, Jülich, Germany

5 Department of Psychiatry, University of British Columbia, Vancouver, BC, Canada

6 Sichuan Provincial Center for Mental Health, Sichuan Provincial People's Hospital, School of Life Science and Technology, University of Electronic Science and Technology of China, Chengdu, China

7 Department of Psychology, Yale University, New Haven, CT, USA

8 Department of Human Genetics, McGill University, Montreal, Canada

9 First Hospital of Quanzhou Affiliated to Fujian Medical University, Quanzhou, Fujian, China

10 Department of Psychiatry, Renmin Hospital of Wuhan University, Wuhan, Hubei Province, China

Equal contribution +  
Corresponding author \*

## **Research Participants Collection Procedures and Data Quality Control**

The study initially recruited a larger cohort, but ultimately excluded 92 participants due to specific criteria ensuring the integrity of the dataset. In the BipD group, 9 participants were excluded after being diagnosed with major depressive disorder during follow-up, 1 due to the presence of organic brain disease, 2 for inability to complete the scan, 4 for excessive head motion, and 4 due to the presence of metal braces. The BipM group saw the exclusion of 8 participants for excessive head motion, 2 for misdiagnosis during follow-up, 4 with comorbid gender identity disorder, 2 with organic brain disease, and 8 who were unable to complete the scan. In the rBD group, 2 participants were excluded following a follow-up diagnosis of major depressive disorder. Within the HCs group, exclusions comprised 4 participants with metal braces, 4 with head motion exceeding 2mm who did not consent to rescanning, and 15 with a significant family history of psychiatric or neurological disorders among first-degree relatives. After these exclusions, the study included 42 BipD patients, 38 BipM patients, 37 rBD patients, and 35 HCs, with all BipM patients completing follow-up through various methods (see Fig. S1 for details). This meticulous selection process underscores the importance of stringent inclusion criteria and rigorous data quality control in ensuring the reliability and validity of the research findings.

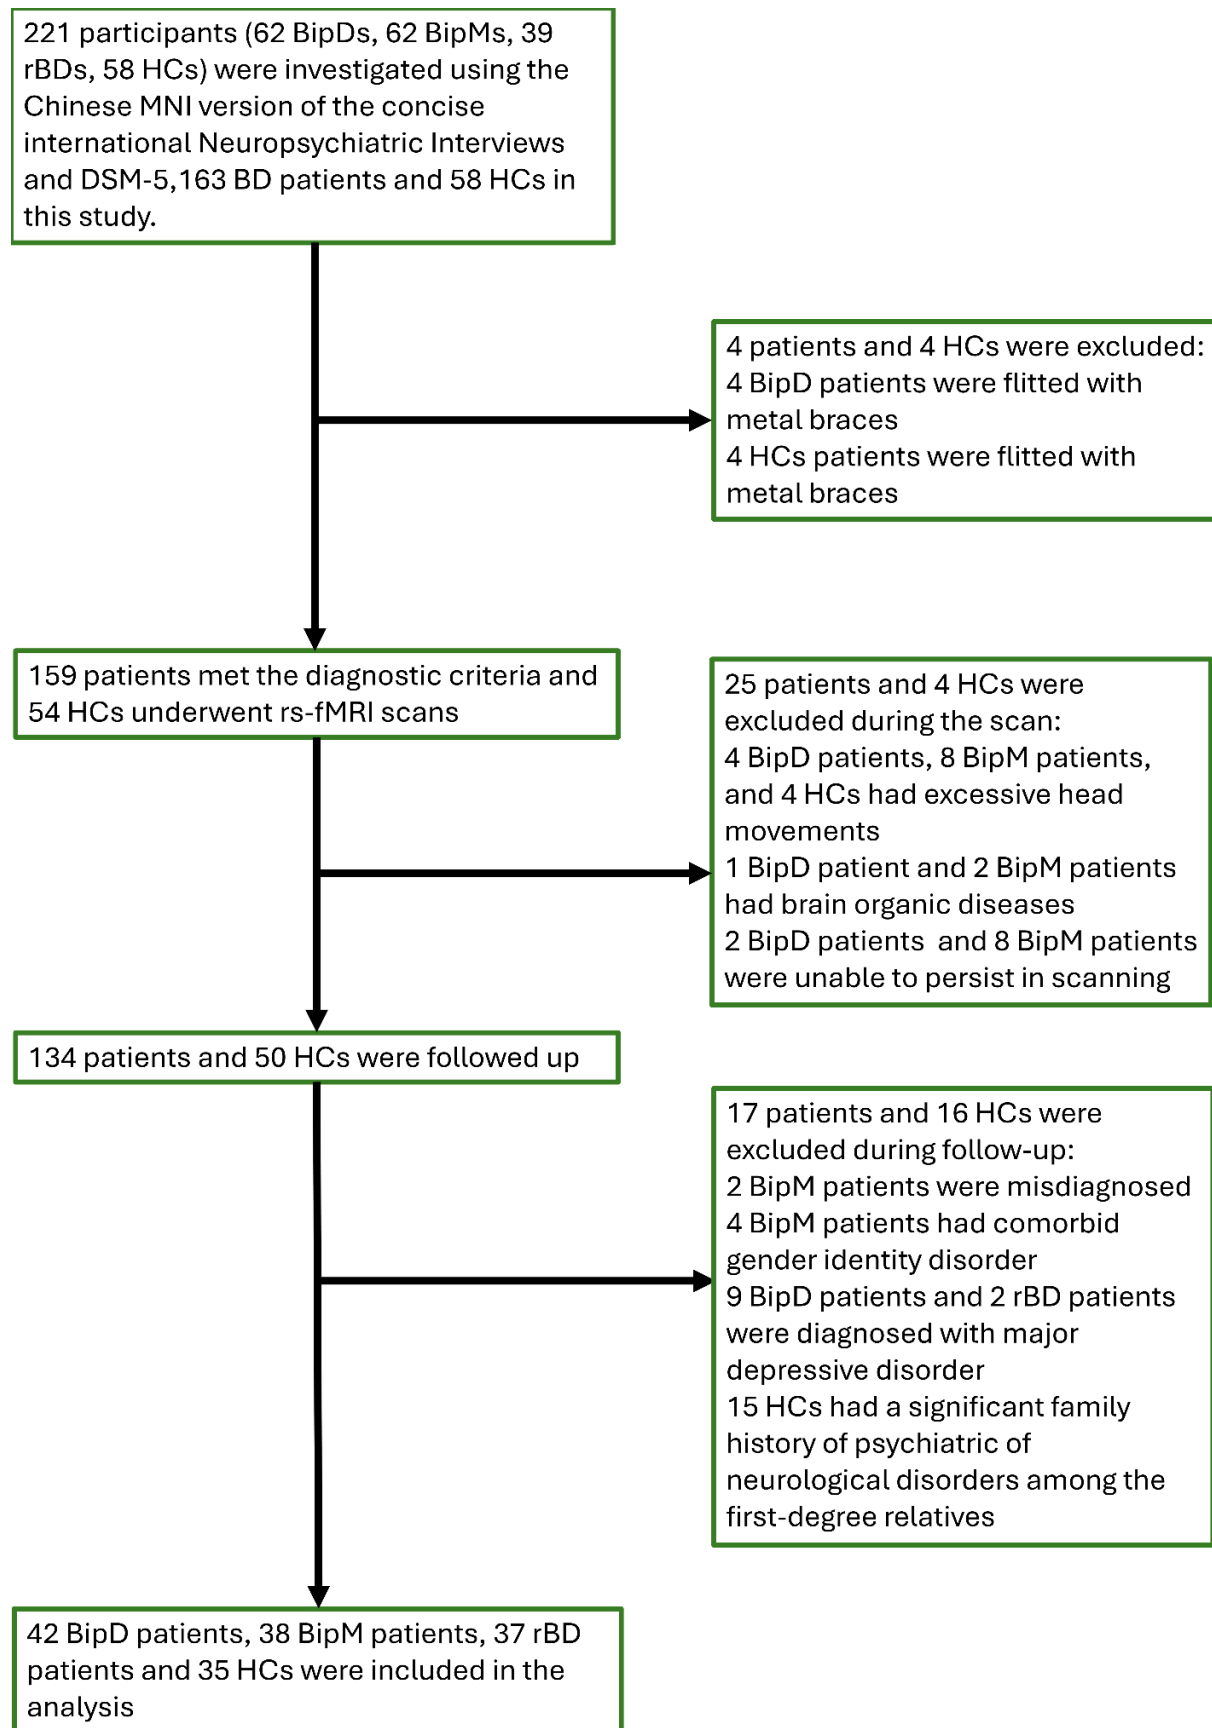

S-Figure.1. The research participants collection procedures and data quality control



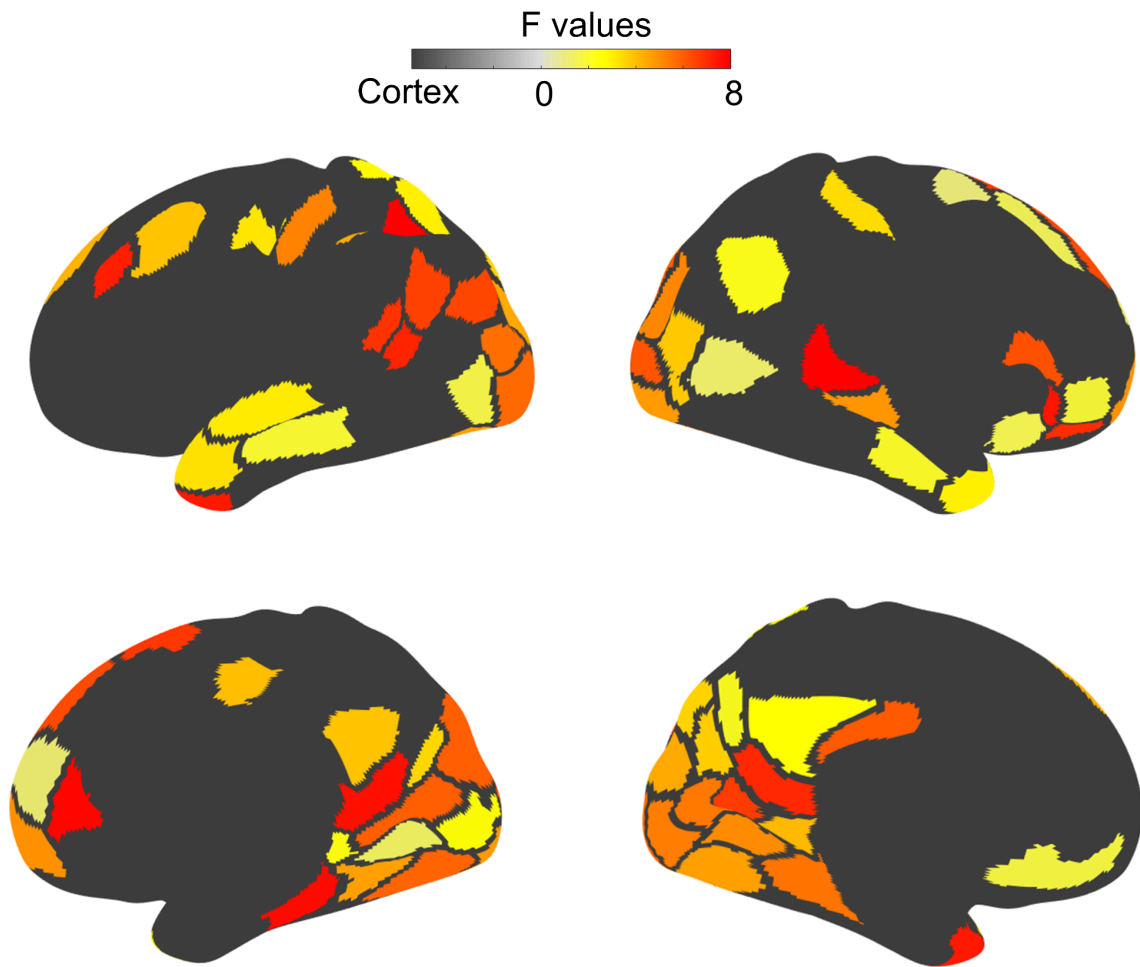

S-Figure.2 Result of one-way Anova among rBD, BipD, BipM and HC ( $p_{fdr} < 0.05$ ).

### a | Specific reorganization regions

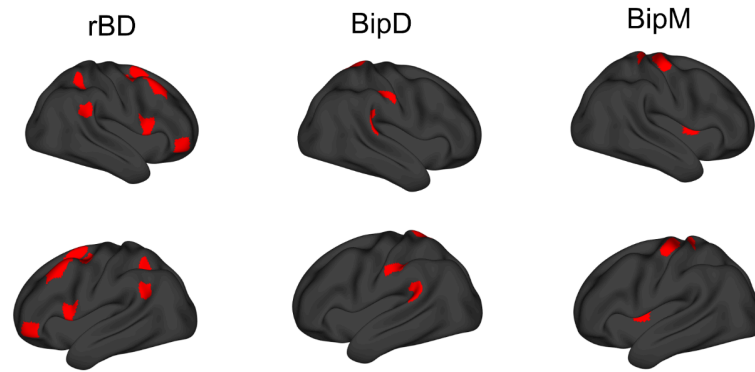

### b | distribution of function gradient

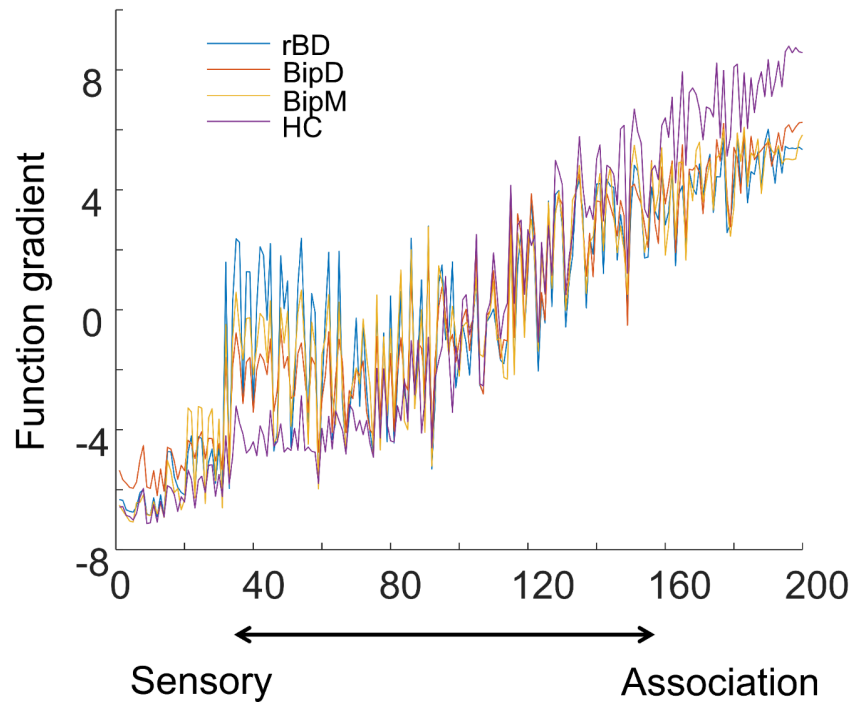

S-Figure.3 a. Specific reorganization regions for rBD, BipM and BipD. b. Average functional gradients across various episodes along the sensory-association axis.

Compared Functional hierarchy among various episodes ( $p < 0.05$ )

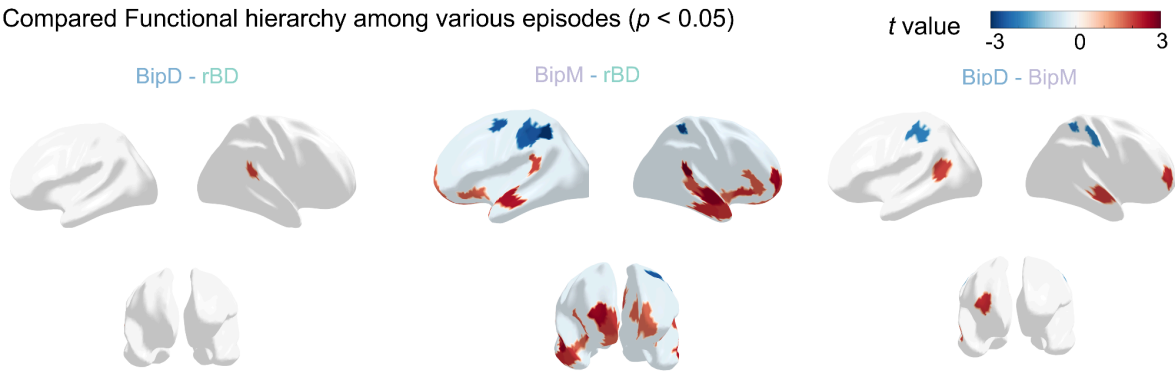

S-Figure.4 The comparison of functional gradients across rBD, BipM and BipD ( $p < 0.05$ ).

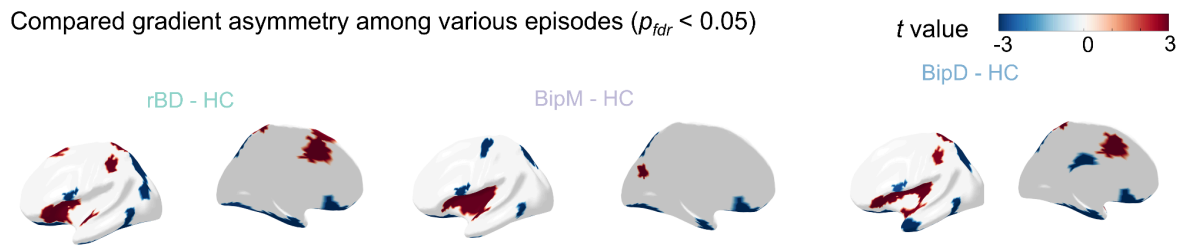

S-Figure.5 Asymmetry gradient comparison between rBD, BipD, BipM and HC ( $p_{FDR} < 0.05$ ).

**a** | Two functional reorganization modes across various episodes

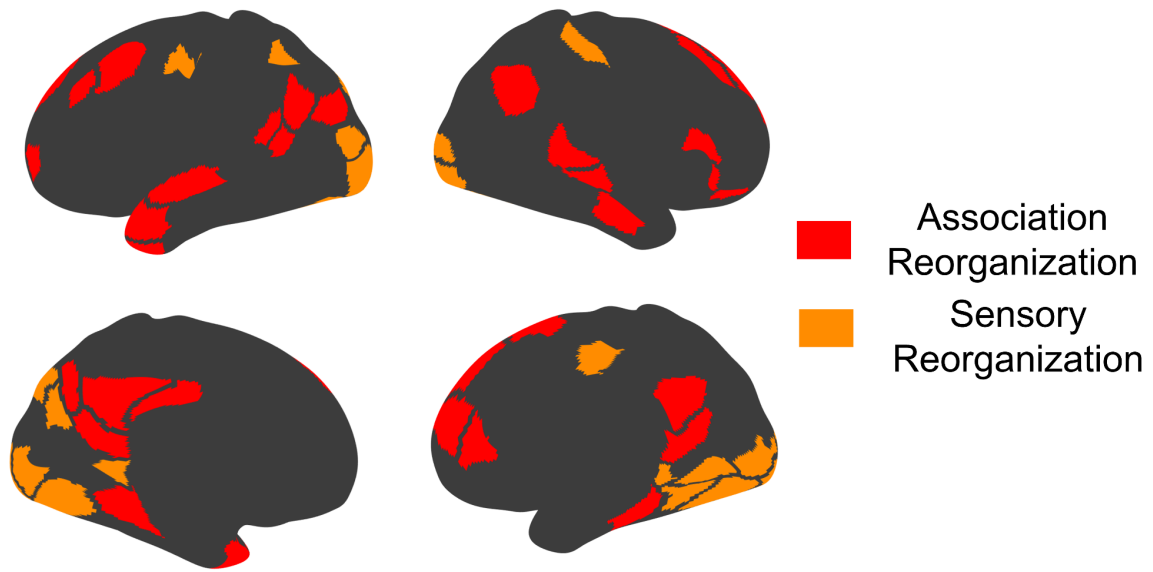

**b** | Heritability of two functional reorganization modes ( $p_{FDR} < 0.05$ )

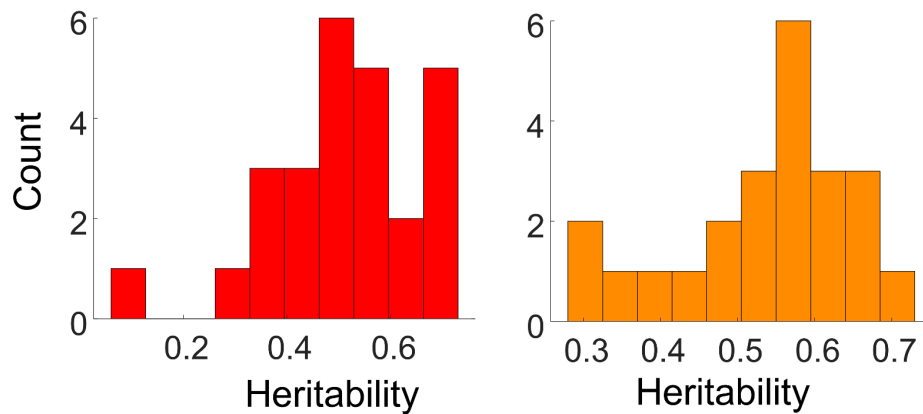

S-Figure.6. Reliability and heritability of the functional reorganization across various BD episodes. **a.** Common reorganization regions across various episodes. **b.** Heritability of functional reorganization anchors in HCP ( $p_{FDR} < 0.05$ ).

## Association between NSP mode and functional gradient

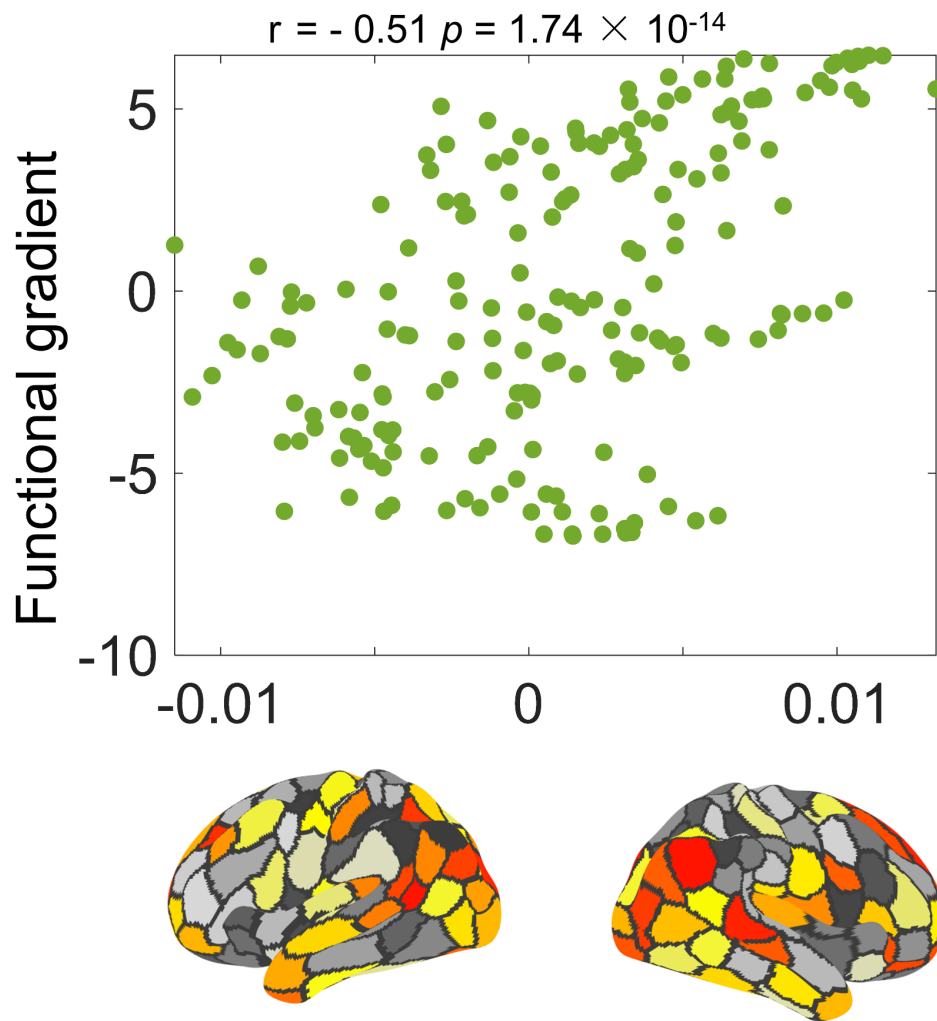

S-Figure 7. The correlation between first NSP mode and functional gradient pattern ( $r = 0.51$ ,  $p = 1.74 \times 10^{-14}$ )

### Association between NSP value and functional gradient in various episodes

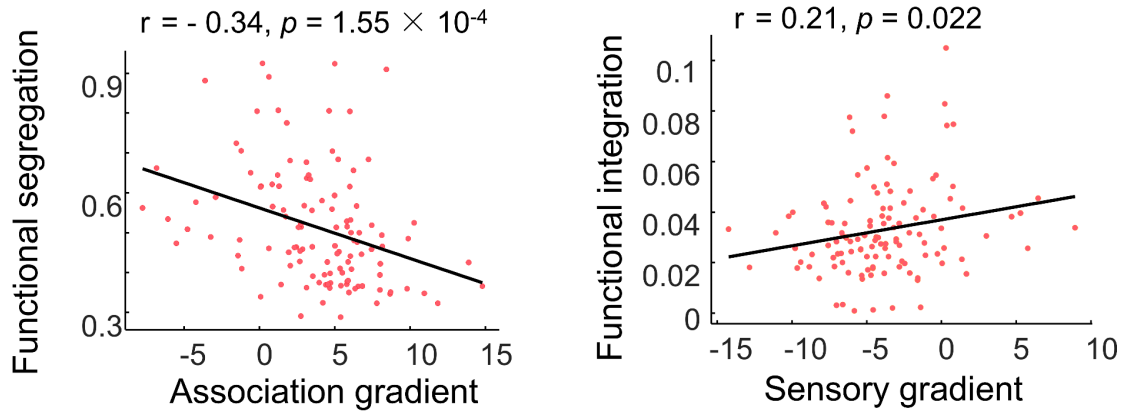

S-Figure 8. Functional integration was positively associated with sensory reorganization ( $r = -0.34$ ,  $p = 1.55 \times 10^{-4}$ ), Functional separation with association reorganization regions ( $r = 0.21$ ,  $p = 0.022$ ).



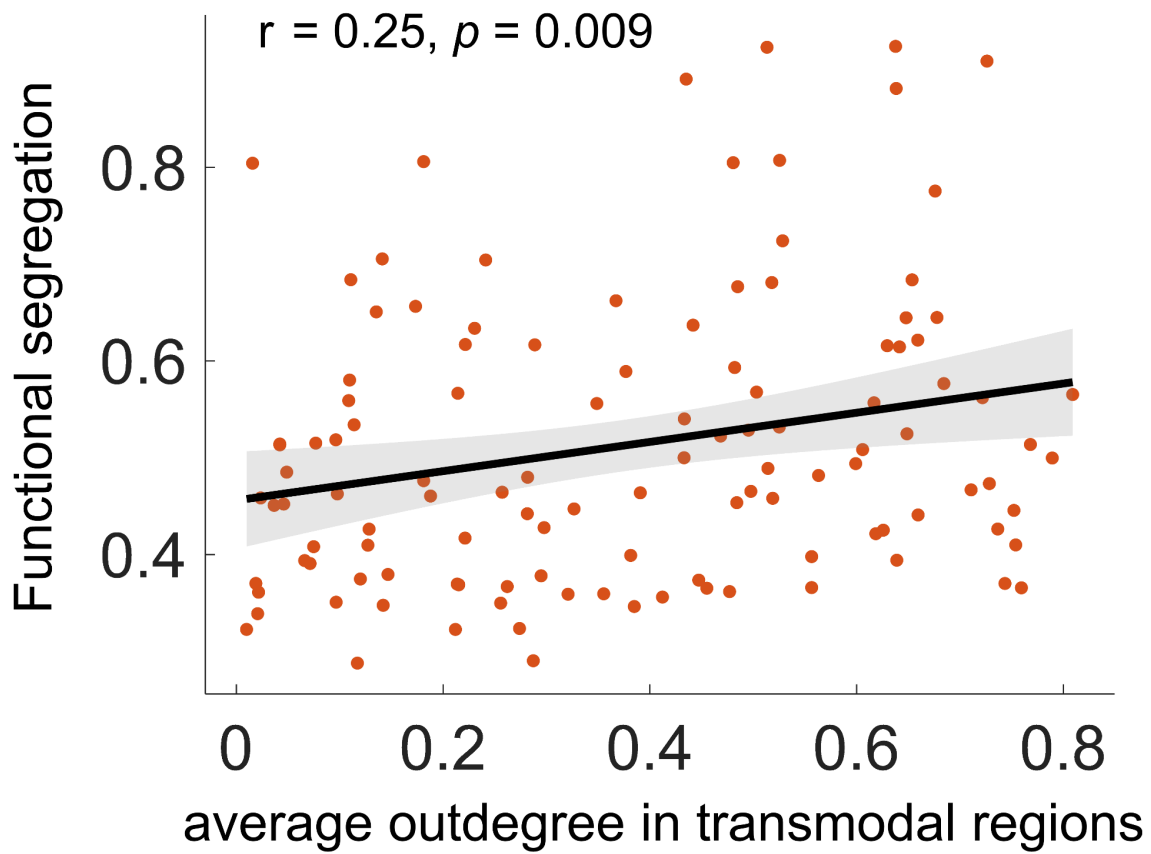

S-Figure 9. The correlation between functional segregation and average outdegree in association regions ( $r = 0.25, p = 0.009$ )
